# Supplementary material for: Synthesis and Spectroscopic Analysis of Piperine- and Piperlongumine-Inspired Natural Product Scaffolds and Their Molecular Docking with IL-1β and NF-κB Proteins
Source: PubMed Central journal article supplement (PMC7356504; doi:10.3390/molecules25122841), 2020-06-19
Supplement: molecules-25-02841-s001.pdf [file molecules-25-02841-s001.pdf]

## ELECTRONIC SUPPORTING INFORMATION

### **Synthesis and Spectroscopic Analysis of *Piperine* and *Piperlongumine*-Inspired Natural Product Scaffolds and their Molecular Docking with IL-1 $\beta$ and NF- $\kappa$ B proteins**

Gabriel Zazeri,<sup>1,2</sup> Ana Paula R. Povinelli,<sup>1,2</sup> Cécile S. Le Duff,<sup>3</sup> Bridget Tang,<sup>3</sup> Marinonio L. Cornelio,<sup>1\*</sup> and Alan M. Jones<sup>2\*</sup>

<sup>1</sup> Departamento de Física – IBILCE, Rua Cristovão Colombo, 2265 CEP 15054-000 São José do Rio Preto - São Paulo, Brazil

<sup>2</sup> School of Pharmacy, University of Birmingham, Edgbaston, B15 2TT, United Kingdom

<sup>3</sup> School of Chemistry, University of Birmingham, Edgbaston, B15 2TT, United Kingdom

\*corresponding authors: MLC ([m.cornelio@unesp.br](mailto:m.cornelio@unesp.br)) and AMJ ([a.m.jones.2@bham.ac.uk](mailto:a.m.jones.2@bham.ac.uk))

## CONTENTS

|                                                                           |          |
|---------------------------------------------------------------------------|----------|
| <sup>1</sup> H NMR spectrum of <b>2</b> (300 MHz, CDCl <sub>3</sub> )     | page S3  |
| <sup>13</sup> C NMR spectrum of <b>2</b> (101 MHz, CDCl <sub>3</sub> )    | page S4  |
| <sup>1</sup> H NMR spectrum of <b>3a</b> (300 MHz, CDCl <sub>3</sub> )    | page S5  |
| <sup>13</sup> C NMR spectrum of <b>3a</b> (101 MHz, CDCl <sub>3</sub> )   | page S6  |
| Mass Spectrometry of <b>3a</b>                                            | page S7  |
| <sup>1</sup> H NMR spectrum of <b>3b</b> (400 MHz, CDCl <sub>3</sub> )    | page S8  |
| <sup>13</sup> C NMR spectrum of <b>3b</b> (101 MHz, CDCl <sub>3</sub> )   | page S9  |
| Mass Spectrometry of <b>3b</b>                                            | page S10 |
| <sup>1</sup> H NMR spectrum of <b>3c</b> (300 MHz, CDCl <sub>3</sub> )    | page S11 |
| <sup>13</sup> C NMR spectrum of <b>3c</b> (101 MHz, CDCl <sub>3</sub> )   | page S12 |
| Mass Spectrometry of <b>3c</b>                                            | page S13 |
| <sup>1</sup> H NMR spectrum of <b>4a</b> (300 MHz, CDCl <sub>3</sub> )    | page S14 |
| <sup>13</sup> C NMR spectrum of <b>4a</b> (126 MHz, CDCl <sub>3</sub> )   | page S15 |
| <sup>1</sup> H- <sup>1</sup> H COSY NMR spectrum of <b>4a</b>             | page S16 |
| <sup>1</sup> H- <sup>13</sup> C HSQC NMR spectrum of <b>4a</b>            | page S17 |
| <sup>1</sup> H- <sup>13</sup> C HMBC NMR spectrum of <b>4a</b>            | page S18 |
| <sup>1</sup> H- <sup>15</sup> N HSQC NMR spectrum of <b>4a</b>            | page S19 |
| <sup>1</sup> H- <sup>15</sup> N HMBC NMR spectrum of <b>4a</b>            | page S20 |
| Mass Spectrometry of <b>4a</b>                                            | page S21 |
| <sup>1</sup> H NMR spectrum of <b>4c</b> (500 MHz, DMSO-d <sub>6</sub> )  | page S22 |
| <sup>13</sup> C NMR spectrum of <b>4c</b> (126 MHz, DMSO-d <sub>6</sub> ) | page S23 |
| <sup>1</sup> H- <sup>1</sup> H COSY NMR spectrum of <b>4c</b>             | page S24 |
| <sup>1</sup> H- <sup>13</sup> C HSQC NMR spectrum of <b>4c</b>            | page S25 |
| <sup>1</sup> H- <sup>13</sup> C HMBC NMR spectrum of <b>4c</b>            | page S26 |
| <sup>1</sup> H- <sup>15</sup> N HSQC NMR spectrum of <b>4c</b>            | page S27 |
| <sup>1</sup> H- <sup>15</sup> N HMBC NMR spectrum of <b>4c</b>            | page S28 |
| Mass Spectrometry of <b>4c</b>                                            | page S29 |
| <sup>1</sup> H NMR spectrum of <b>7a</b> (300 MHz, CDCl <sub>3</sub> )    | page S30 |
| <sup>13</sup> C NMR spectrum of <b>7a</b> (101 MHz, CDCl <sub>3</sub> )   | page S31 |
| Mass Spectrometry of <b>7a</b>                                            | page S32 |
| <sup>1</sup> H NMR spectrum of <b>7b</b> (300 MHz, CD <sub>3</sub> OD)    | page S33 |
| <sup>1</sup> H NMR spectrum of <b>8a</b> (300 MHz, CDCl <sub>3</sub> )    | page S34 |
| <sup>1</sup> H NMR spectrum of <b>8b</b> (300 MHz, CD <sub>3</sub> OD)    | page S35 |
| <sup>1</sup> H NMR spectrum of <b>9a</b> (300 MHz, CDCl <sub>3</sub> )    | page S36 |
| <sup>1</sup> H NMR spectrum of <b>9b</b> (300 MHz, CDCl <sub>3</sub> )    | page S37 |
| <sup>1</sup> H NMR spectrum of <b>10</b> (300 MHz, CDCl <sub>3</sub> )    | page S38 |
| Computational models                                                      | page S39 |
| <i>Ab initio</i> Calculation of selected dihedral torsional angles        | page S40 |
| References                                                                | page S48 |

<sup>1</sup>H NMR spectrum of **2** (300 MHz, CDCl<sub>3</sub>)

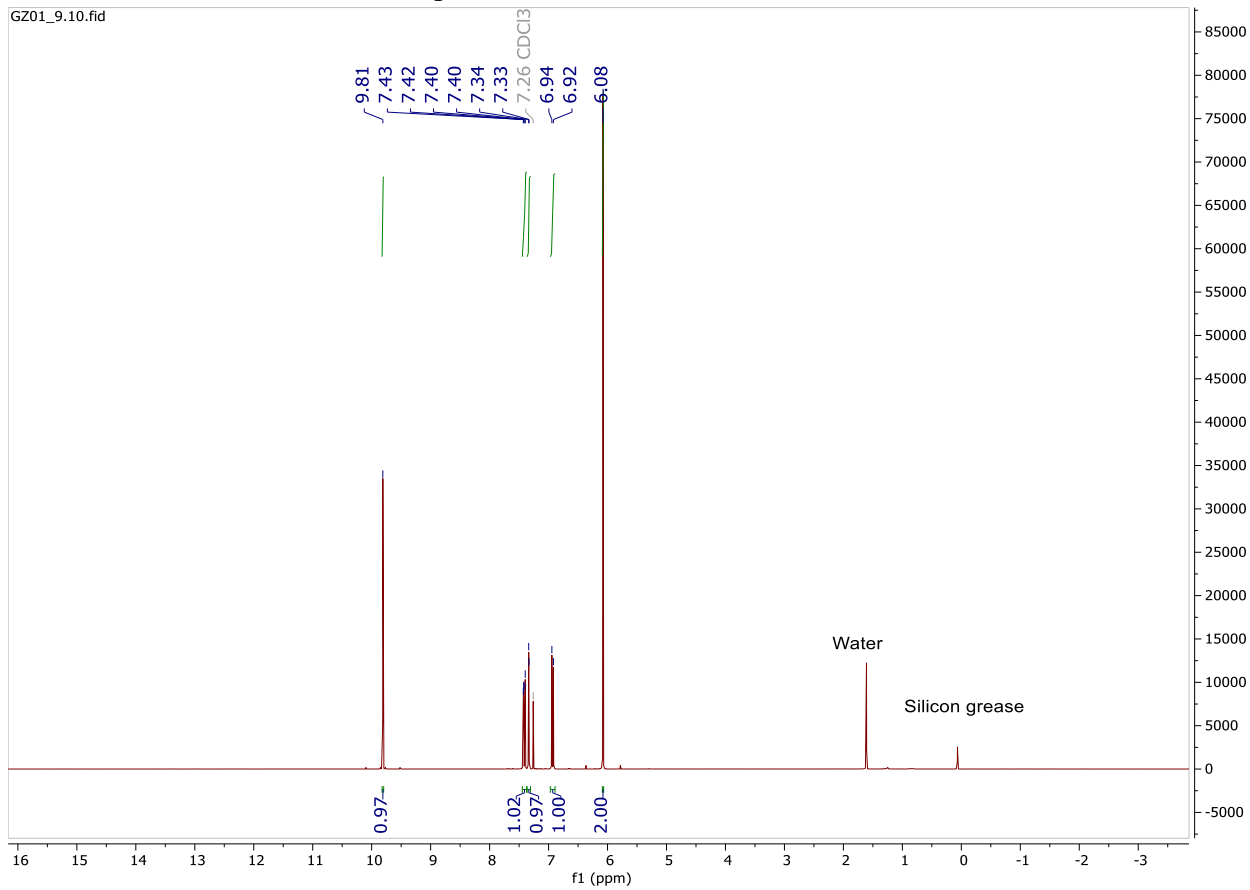

$^{13}\text{C}$  NMR spectrum of **2** (101 MHz,  $\text{CDCl}_3$ )

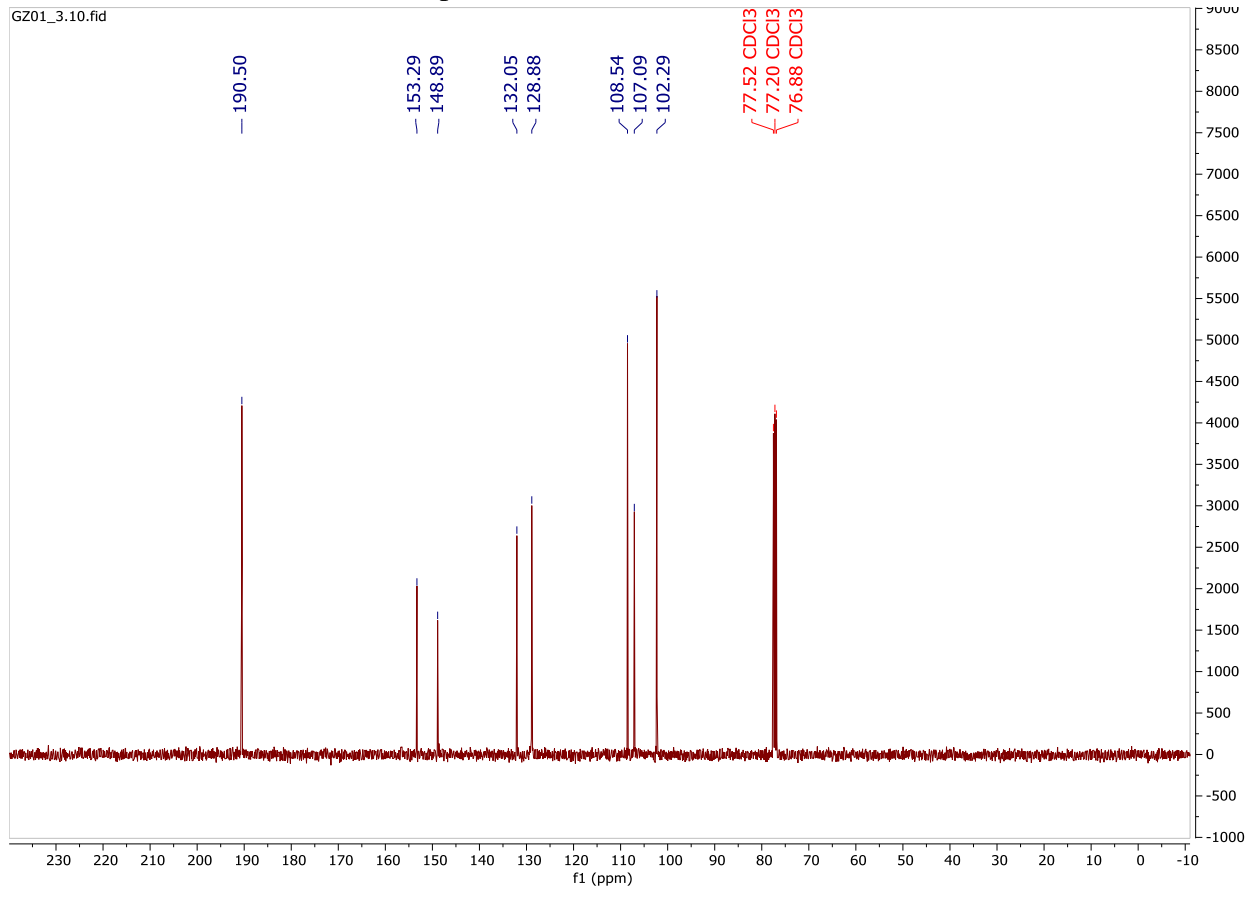

<sup>1</sup>H NMR spectrum of **3a** (300 MHz, CDCl<sub>3</sub>)

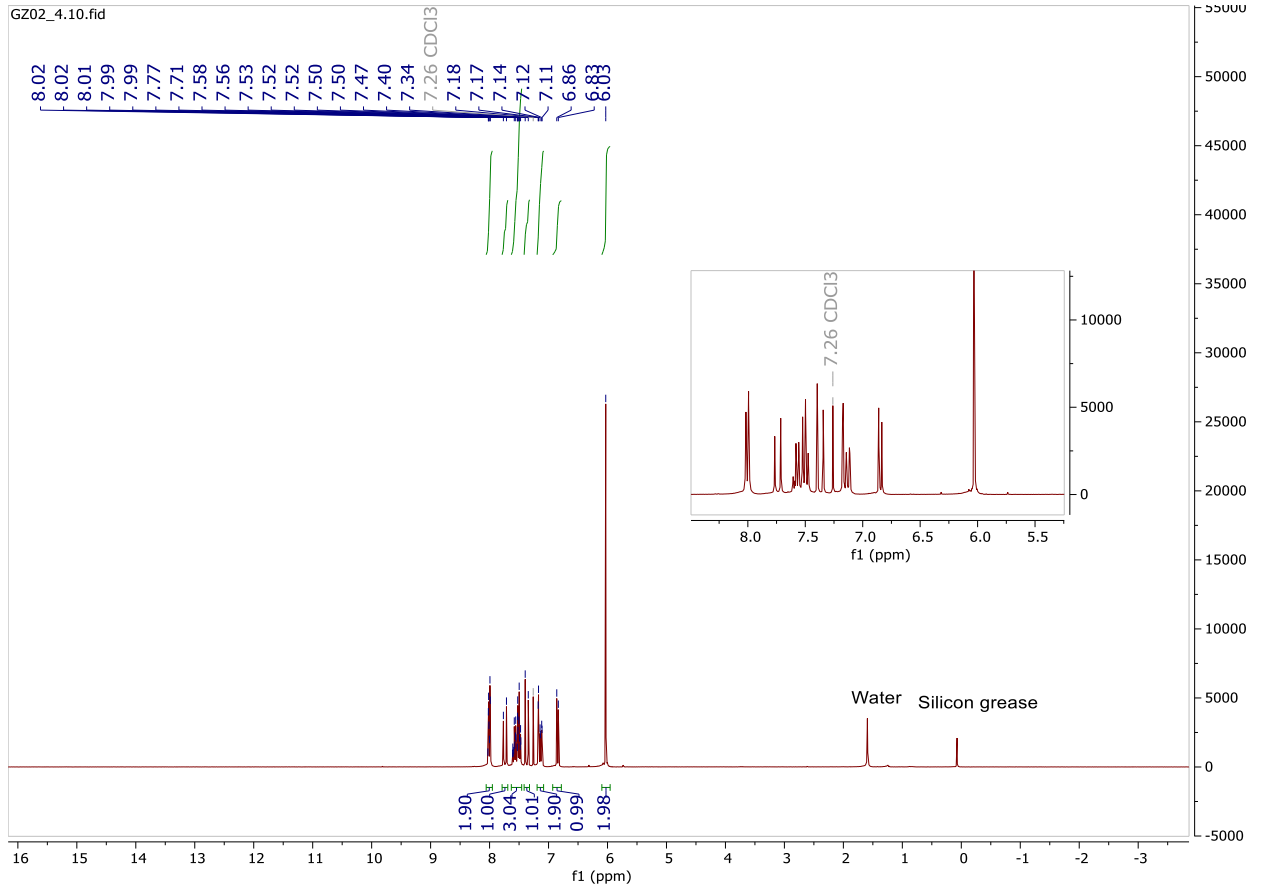

<sup>13</sup>C NMR spectrum of **3a** (101 MHz, CDCl<sub>3</sub>)

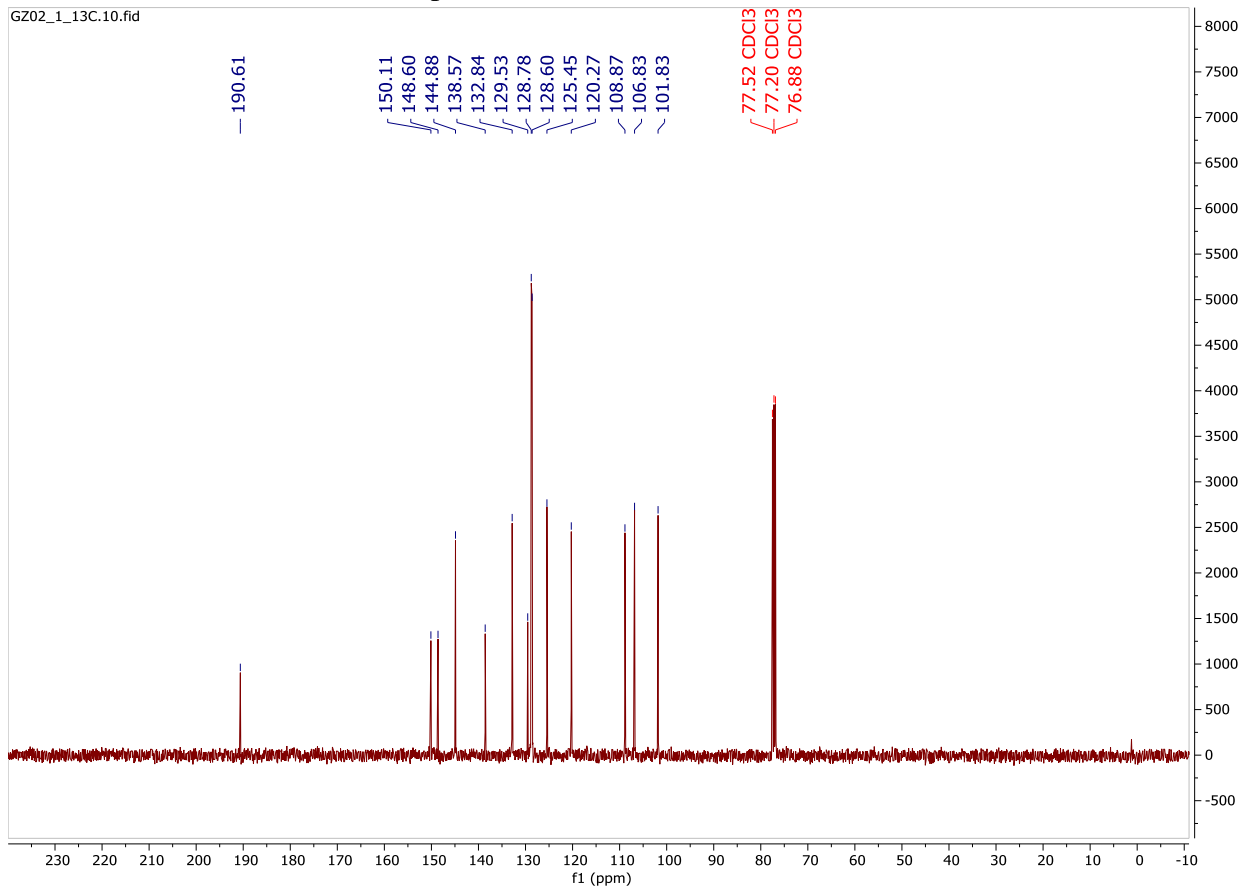

# Mass Spectrometry of 3a

GZ02\_4 C16H12O3 MW=25227  
(DCM)/CH3OH:H2O:0.1% Formic Acid  
AMJ-GXZ-3CR7R-ESI-1 (0.067) Is (1.00,3.00) C16H12O3H

University of Birmingham, School of Chemistry  
Waters Xevo G2-XS

Gabriel Zazeri  
29-Jan-2020  
2: TOF MS ES+  
8.35e12

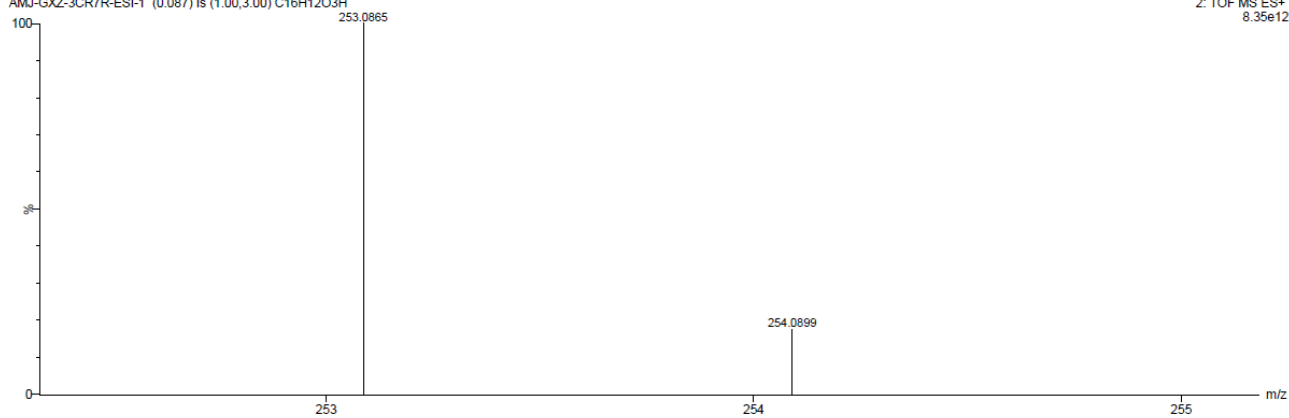

AMJ-GXZ-3CR7R-ESI-1 53 (2.320) AM (Cen,3, 50.00, Ar,10000.0,0.00,0.00); Sm (SG, 10x2.00); Cm (53:59)

2: TOF MS ES+  
3.02e5

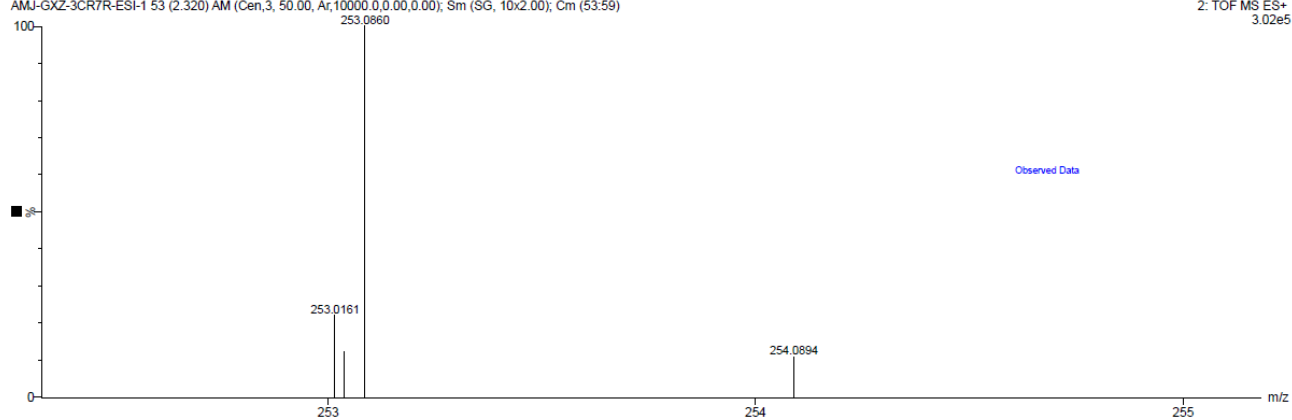

<sup>1</sup>H NMR spectrum of **3b** (400 MHz, CDCl<sub>3</sub>)

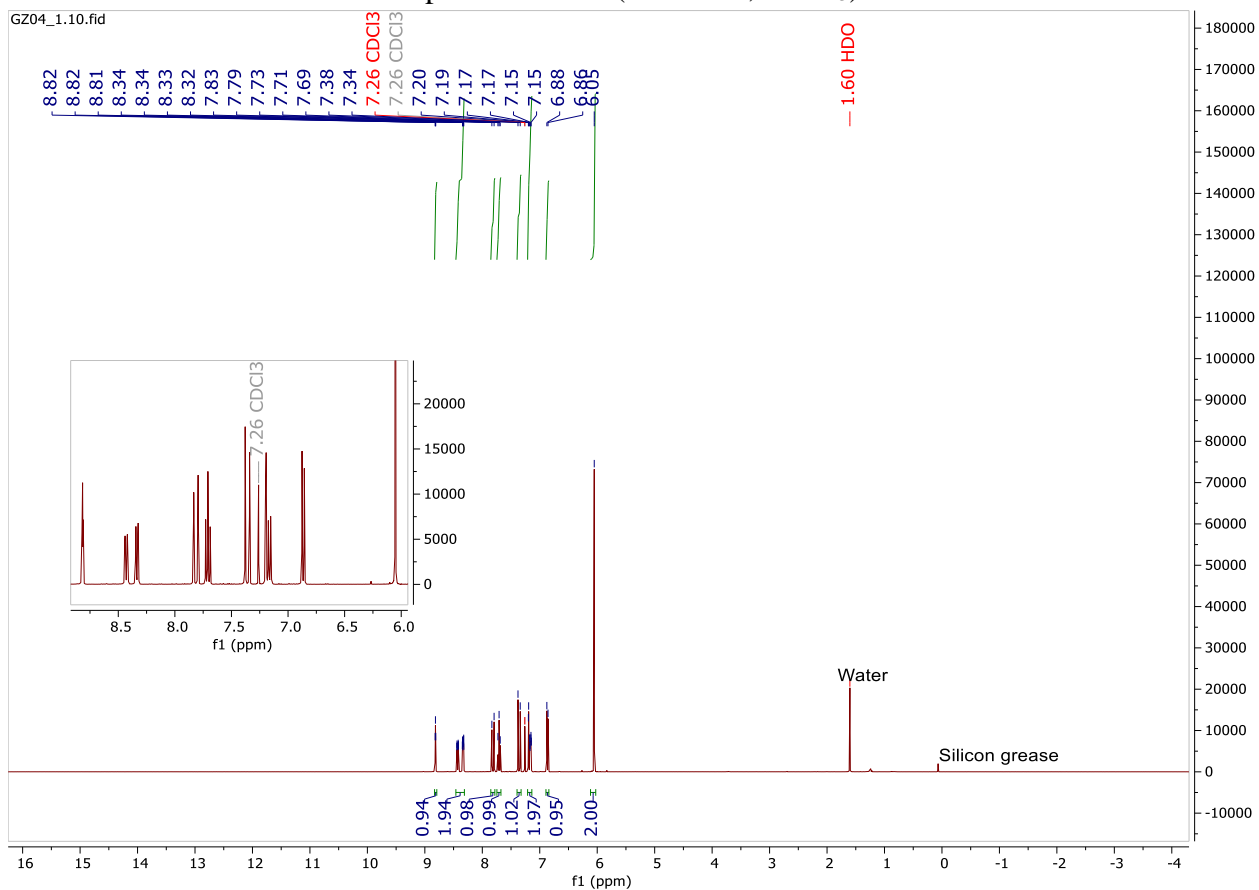



<sup>13</sup>C NMR spectrum of **3b** (101 MHz, CDCl<sub>3</sub>)

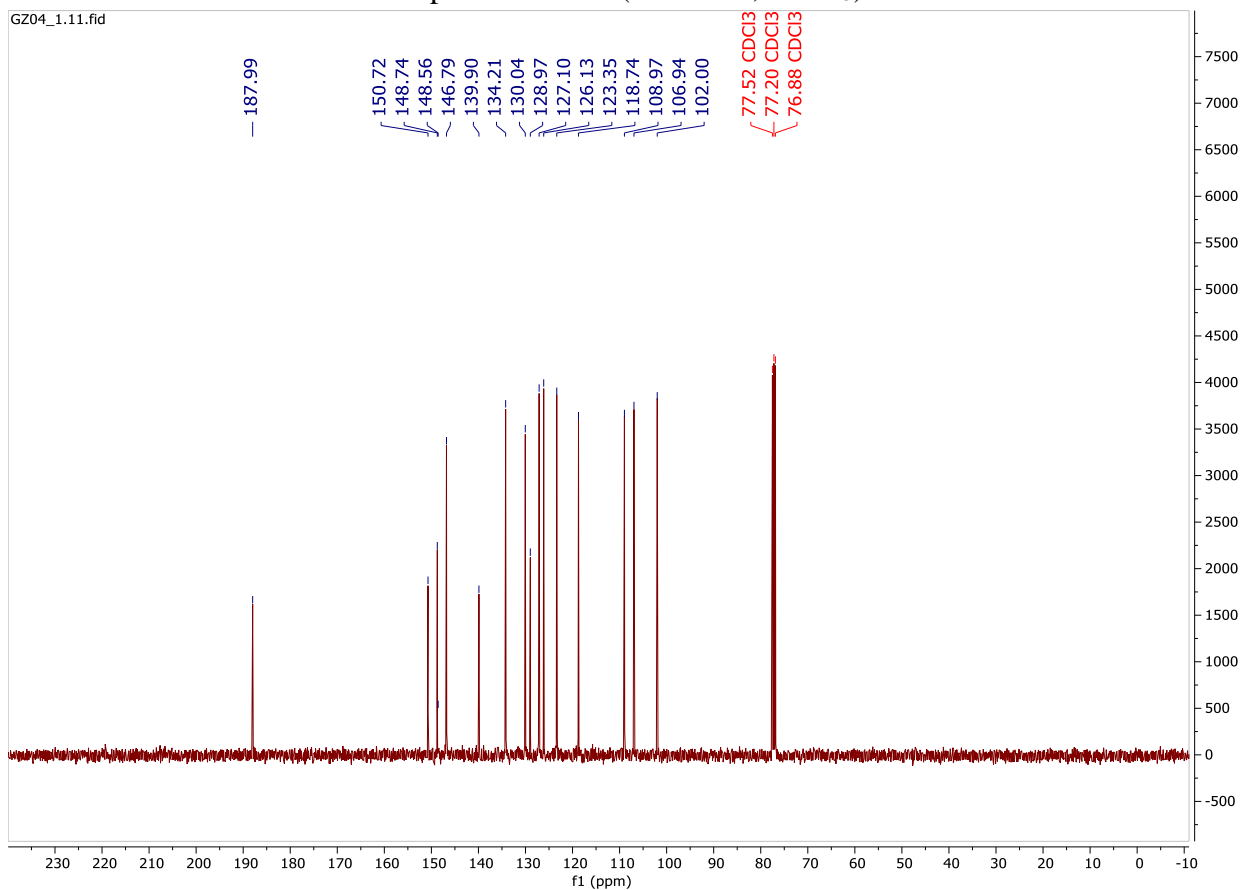

# Mass Spectrometry of 3b

GZ04\_1 C16H11NO5 MW=297  
(DCM)/CH3OH:H2O:0.1% Formic Acid  
AMJ-GXZ-3CWAA-ESI-1 (0.087) Is (1.00,3.00) C16H11NO5H

University of Birmingham, School of Chemistry  
Waters Xevo G2-XS

Gabriel Zazeri  
30-Jan-2020  
2: TOF MS ES+  
8.28e12

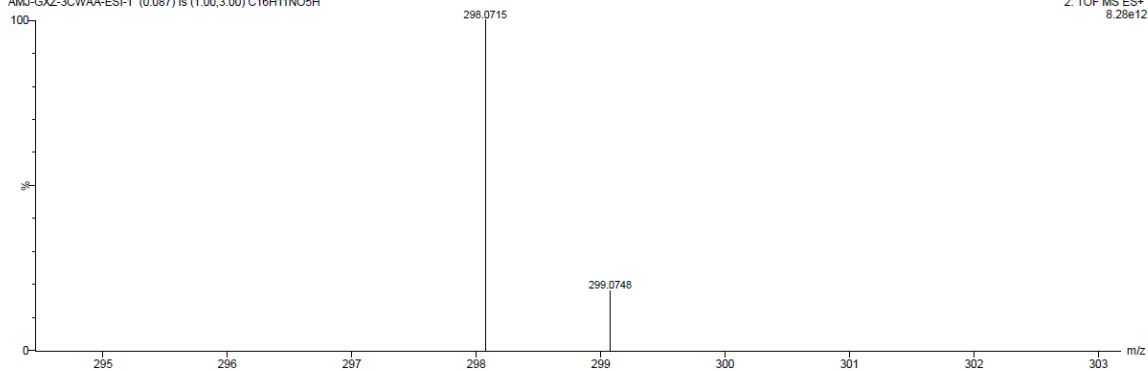

AMJ-GXZ-3CWAA-ESI-1 8 (0.360) AM (Cen,3, 50.00, Ar,10000.0,0.00,0.00); Sm (SG, 10x2.00); Cm (7.8)

2: TOF MS ES+  
1.07e5

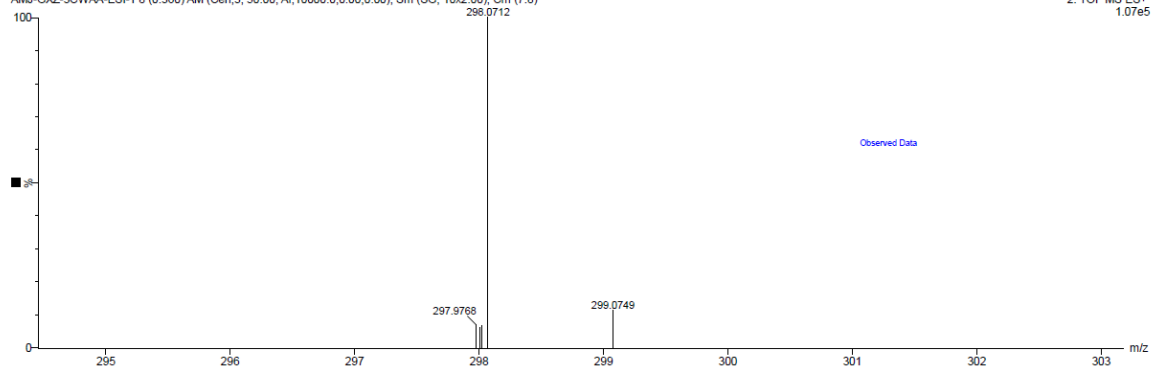

<sup>1</sup>H NMR spectrum of **3c** (300 MHz, CDCl<sub>3</sub>)

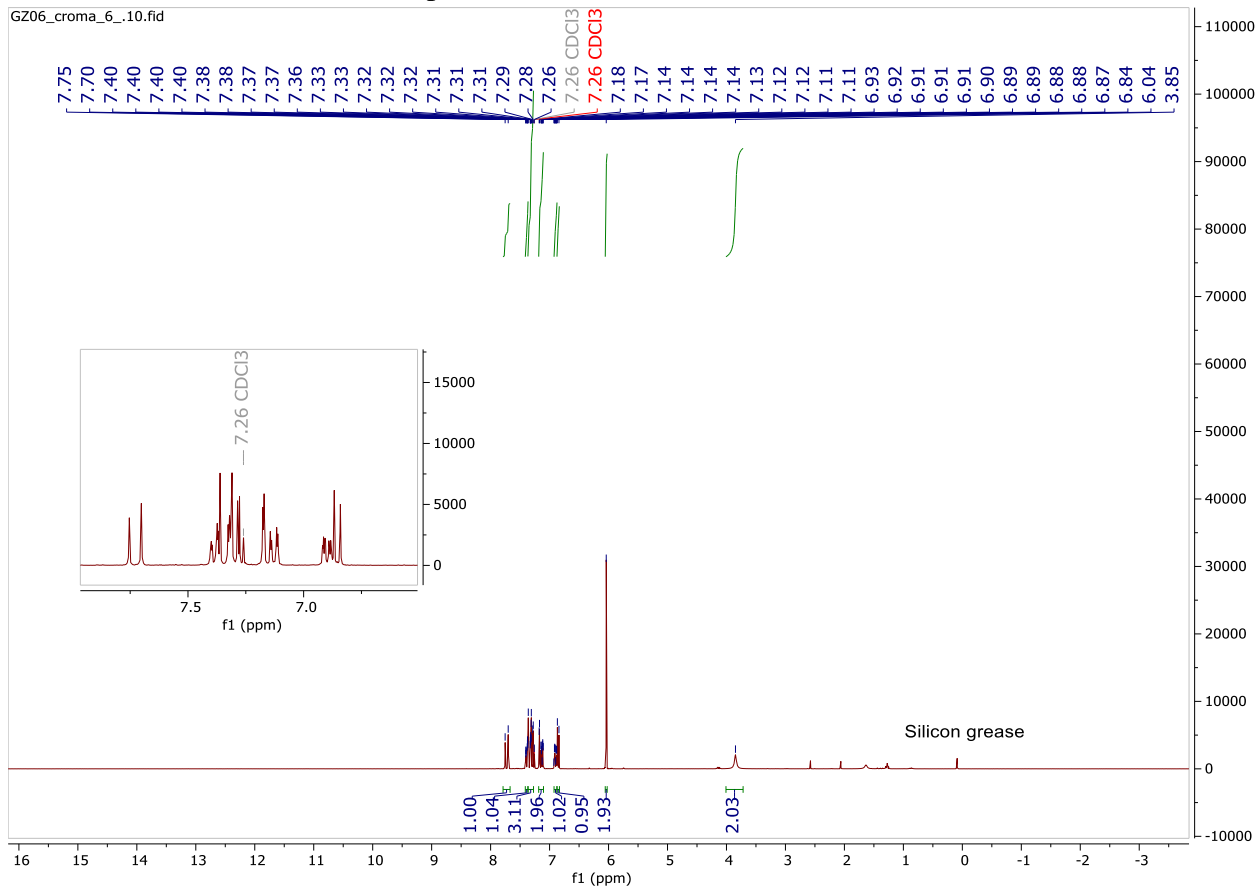

<sup>13</sup>C NMR spectrum of **3c** (101 MHz, CDCl<sub>3</sub>)

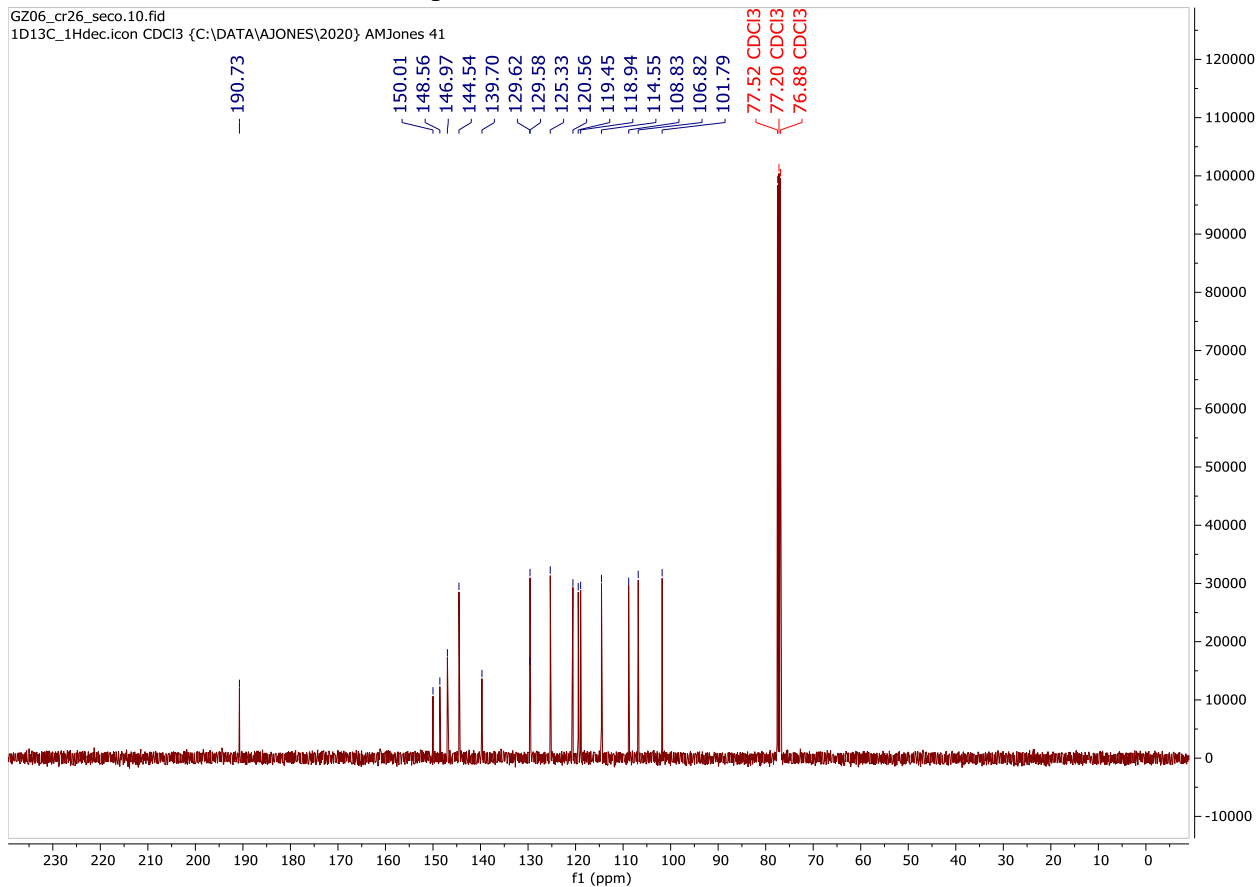

# Mass Spectrometry of 3c

GZ06 C16H13NO3 MW=267  
(DCM)/CH3OH:H2O:0.1% Formic Acid  
AMJ-GXZ-3KMYF-ESI-1 (0.070) Is (1.00,3.00) C16H13NO3H

University of Birmingham, School of Chemistry  
Waters Xevo G2-XS

Gabriel Zazeri  
13-Mar-2020  
1: TOF MS ES+  
8.31e12

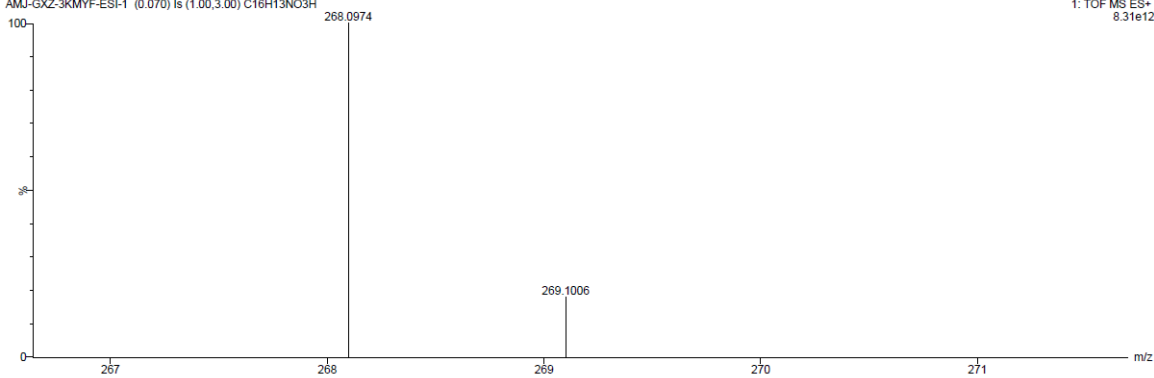

AMJ-GXZ-3KMYF-ESI-1 21 (0.929) AM (Cen,3, 50.00, Ar,10000.0,0.00,0.00); Sm (SG, 10x2.00); Cm (21:24)

1: TOF MS ES+  
2.72e8

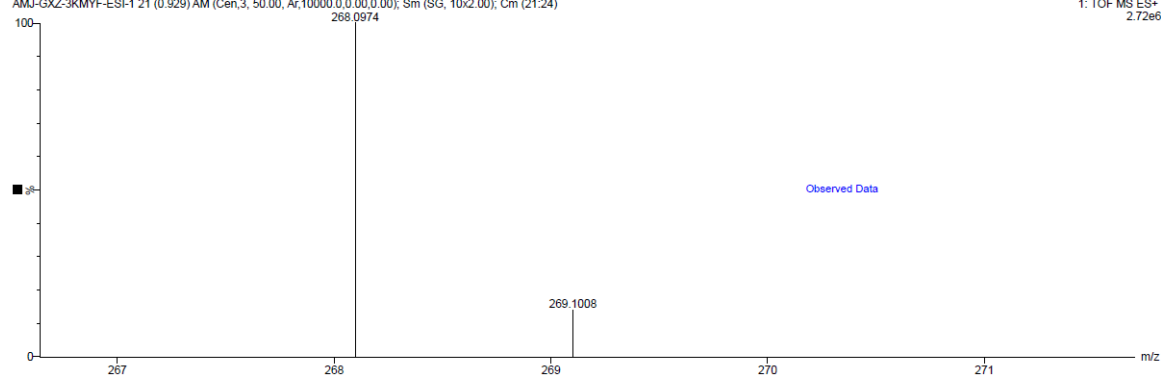

<sup>1</sup>H NMR spectrum of **4a** (300 MHz, CDCl<sub>3</sub>)

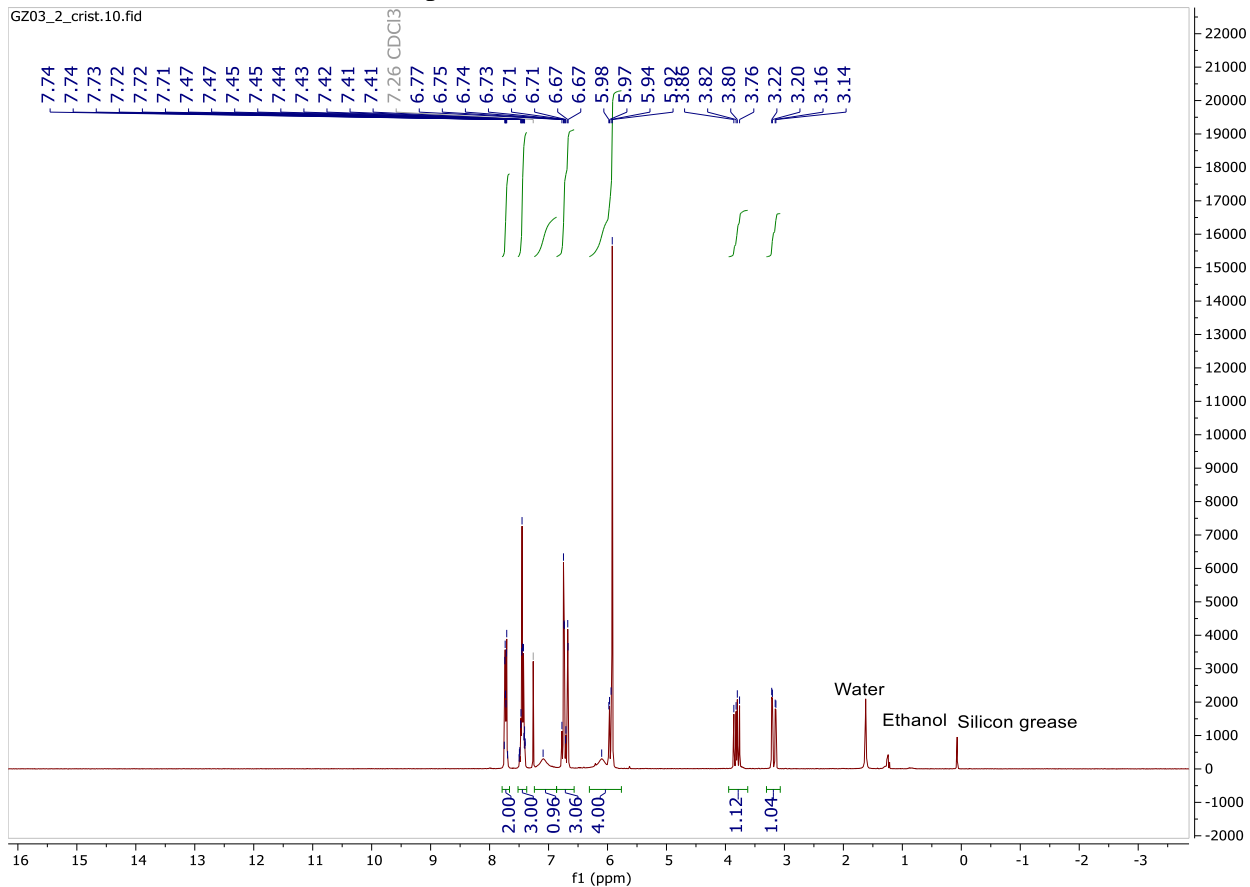

<sup>13</sup>C NMR spectrum of **4a** (126 MHz, CDCl<sub>3</sub>)

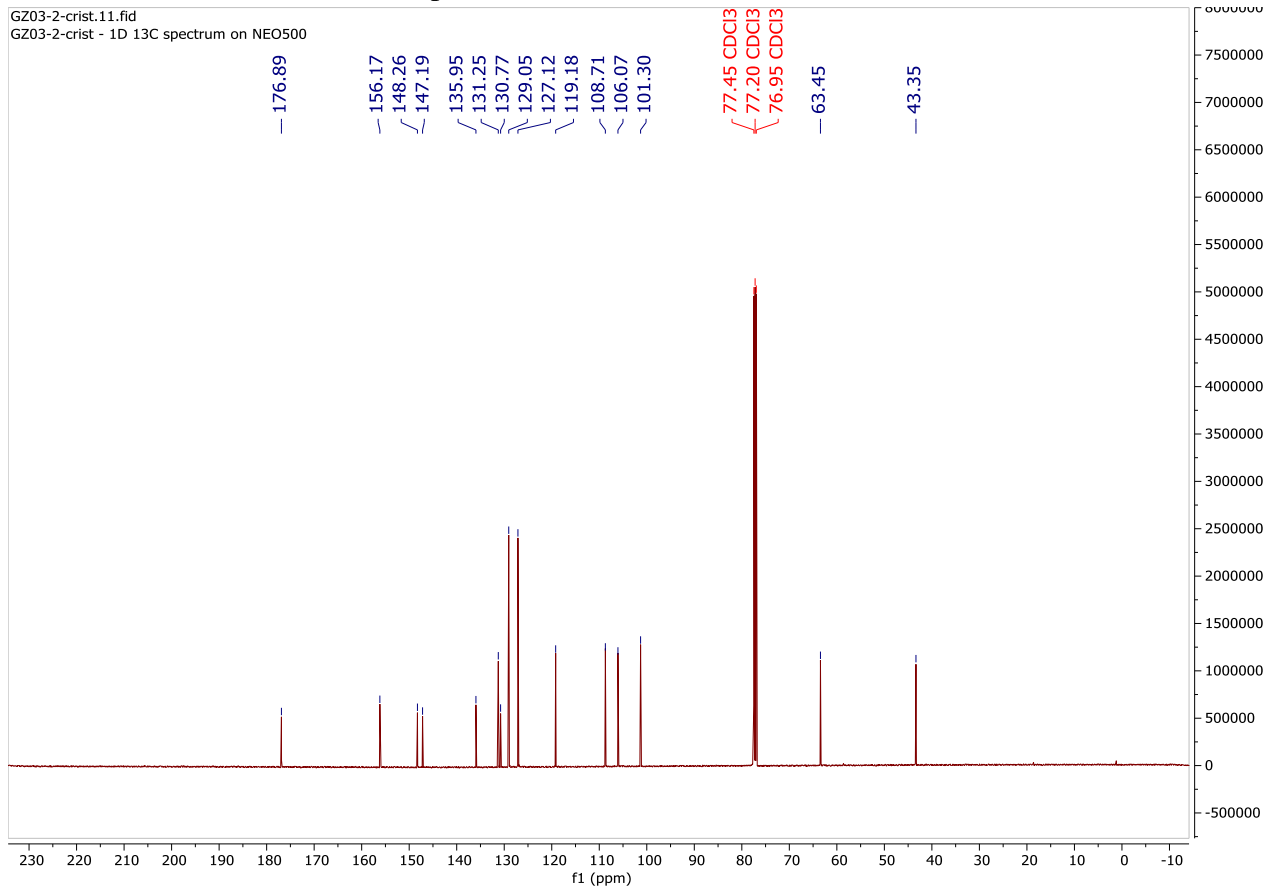

$^1\text{H}$ - $^1\text{H}$  COSY NMR spectrum of **4a**

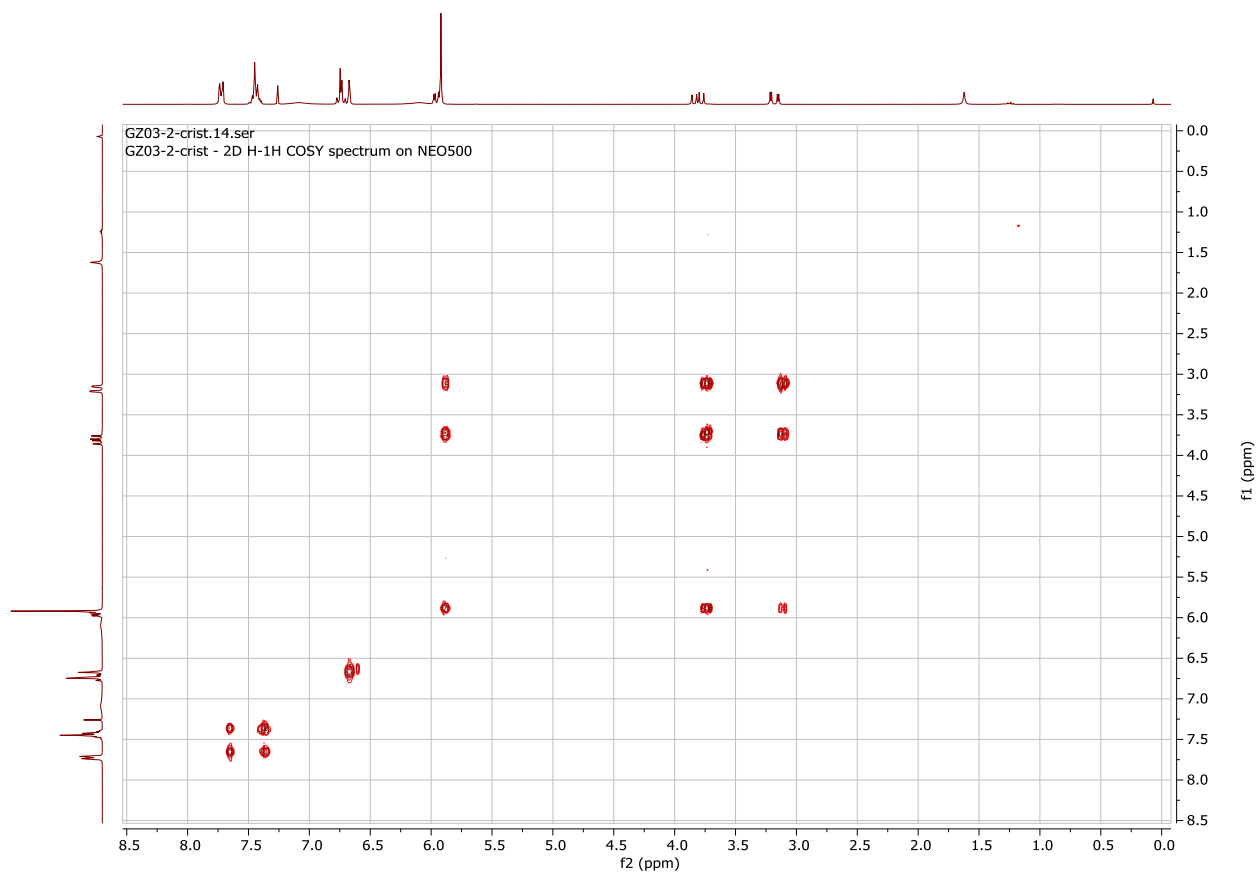



$^1\text{H}$ - $^{13}\text{C}$  HSQC NMR spectrum of **4a**

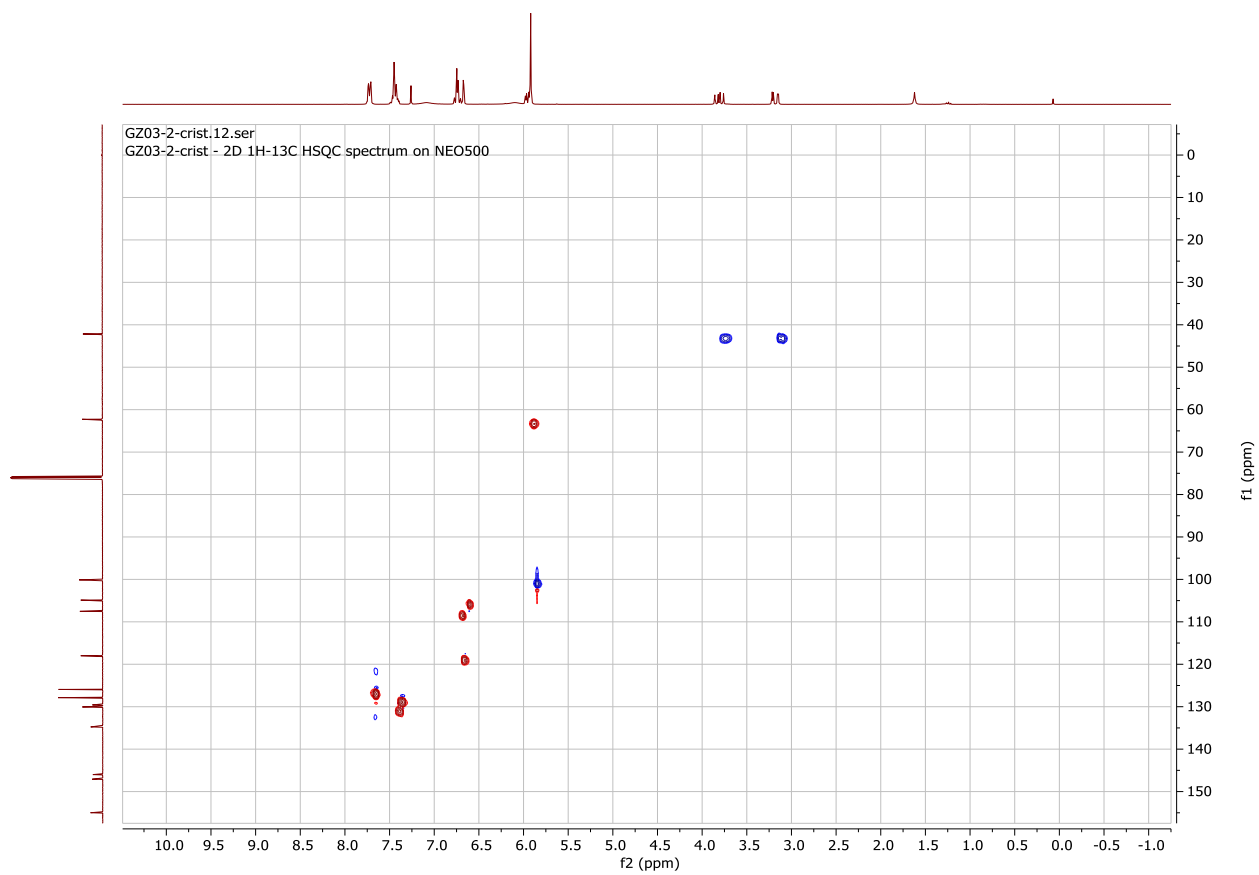

$^1\text{H}$ - $^{13}\text{C}$  HMBC NMR spectrum of **4a**

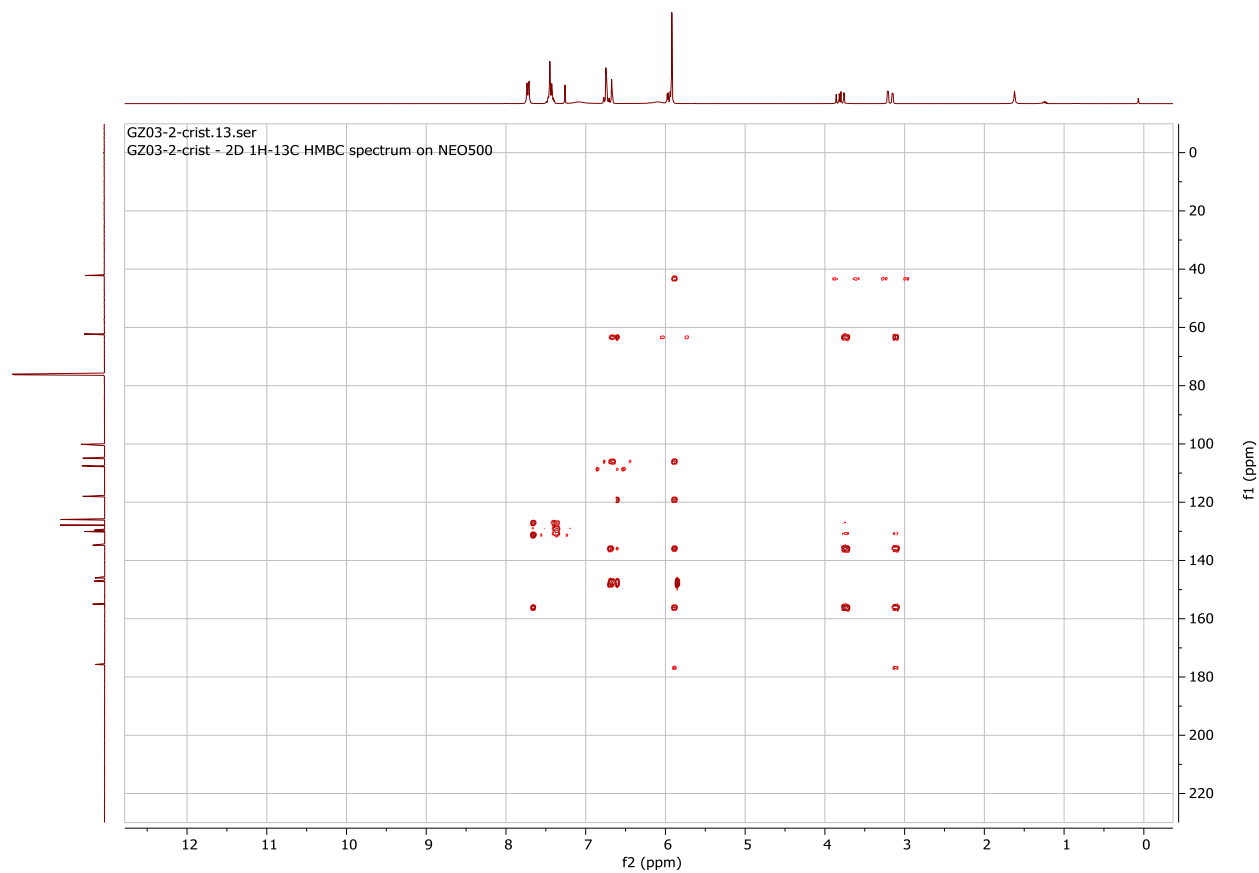

$^1\text{H}$ - $^{15}\text{N}$  HSQC NMR spectrum of **4a**

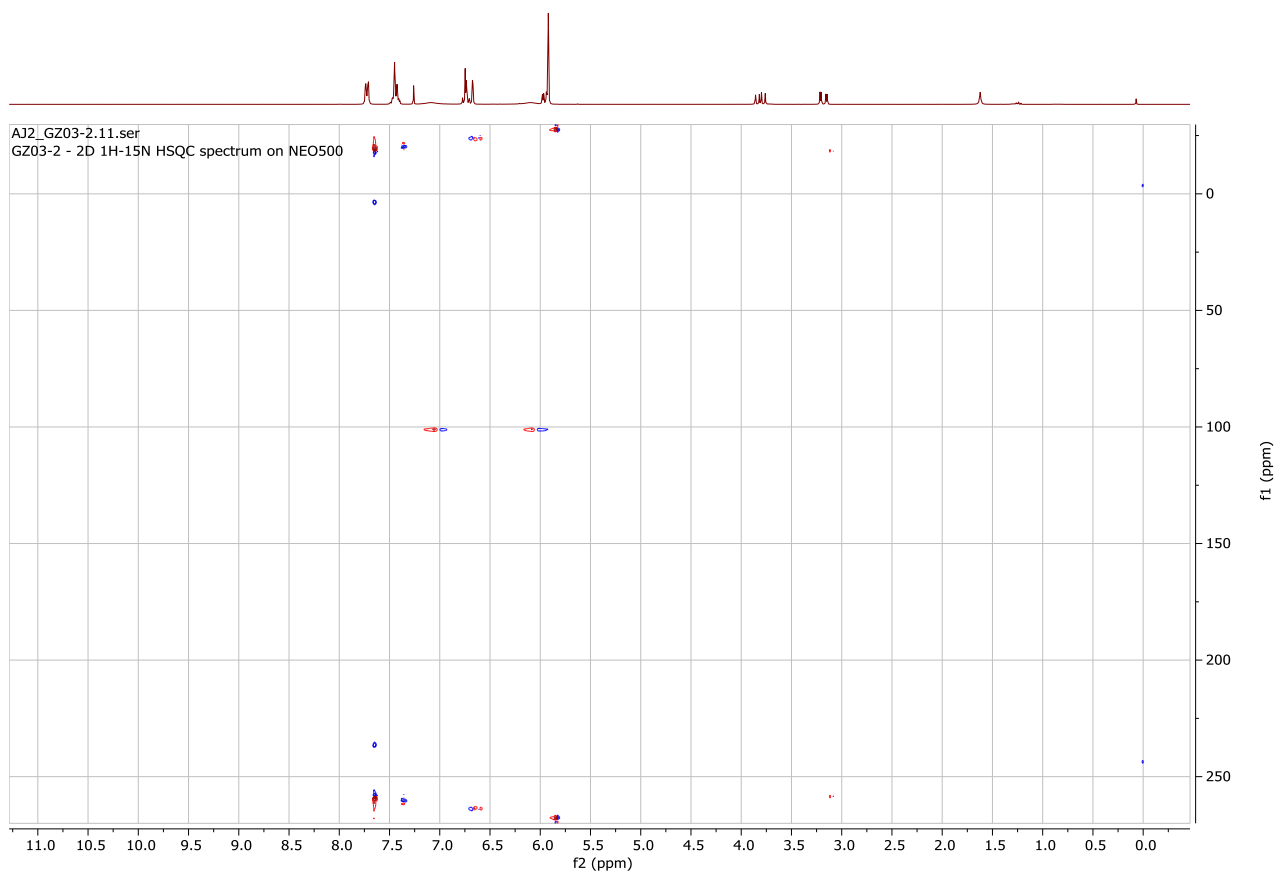

$^1\text{H}$ - $^{15}\text{N}$  HMBC NMR spectrum of **4a**

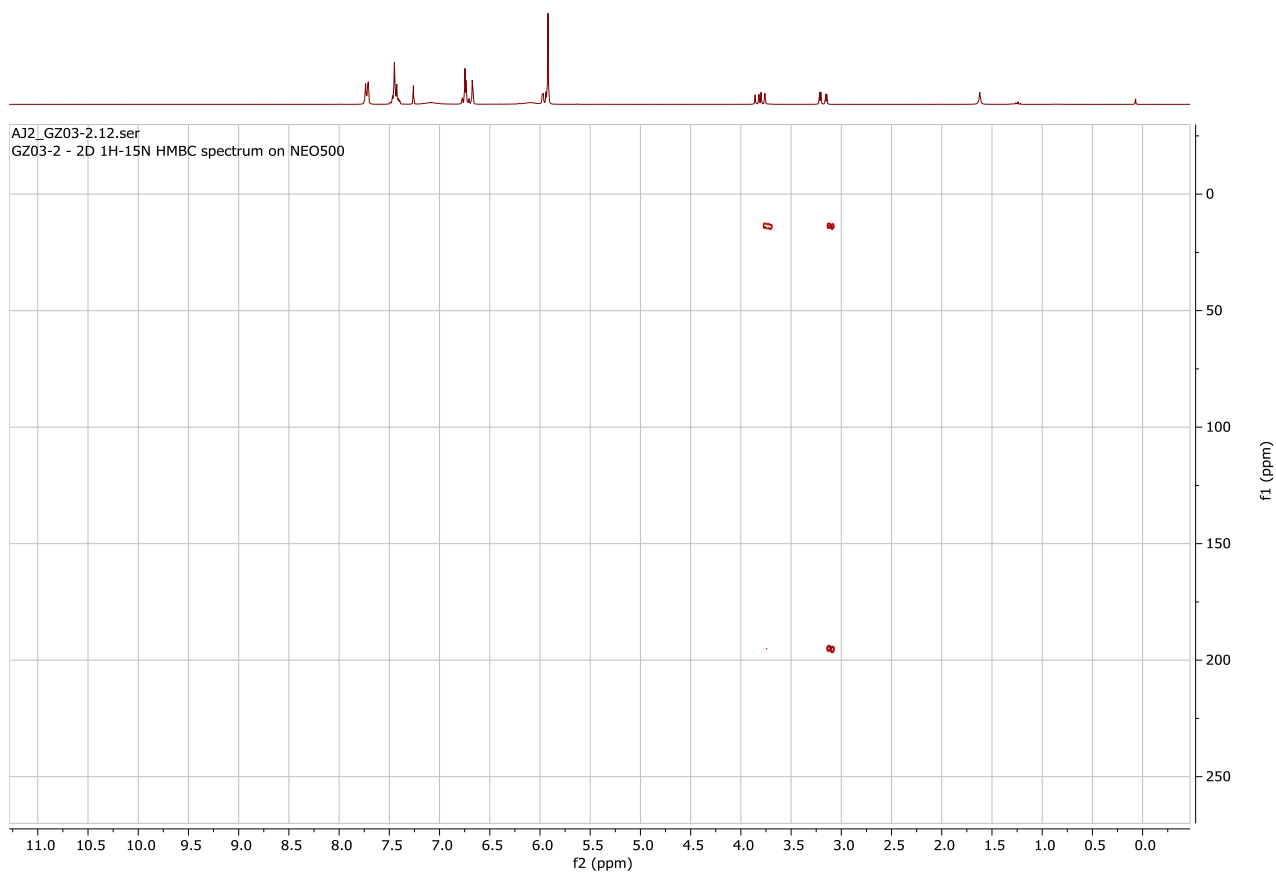

# Mass Spectrometry of 4a

GZ03\_2 C17H15N3O2S MW=325  
(DCM)/CH3OH:H2O:0.1% Formic Acid  
AMU-GXZ-3CT94-ESI-1 (0.087) Is (1.00,3.00) C17H15N3O2SH

University of Birmingham, School of Chemistry  
Waters Xevo G2-XS

Gabriel Zazeni  
29-Jan-2020  
2: TOF MS ES+  
7.77e12

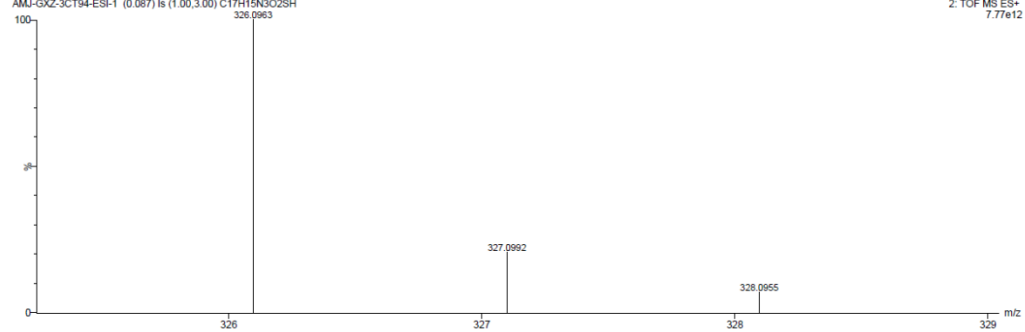

AMU-GXZ-3CT94-ESI-1 50 (2.182) AM (Cen,3, 50.00, Ar,100000.0,0.00,0.00); Sm (SG, 10x2.00); Cm (41.56-109-115)

2: TOF MS ES+  
1.42e5

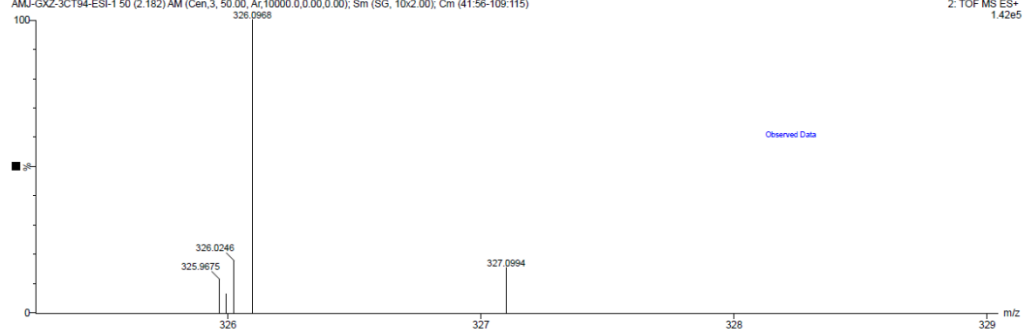

# <sup>1</sup>H NMR spectrum of 4c (500 MHz, DMSO-d<sub>6</sub>)

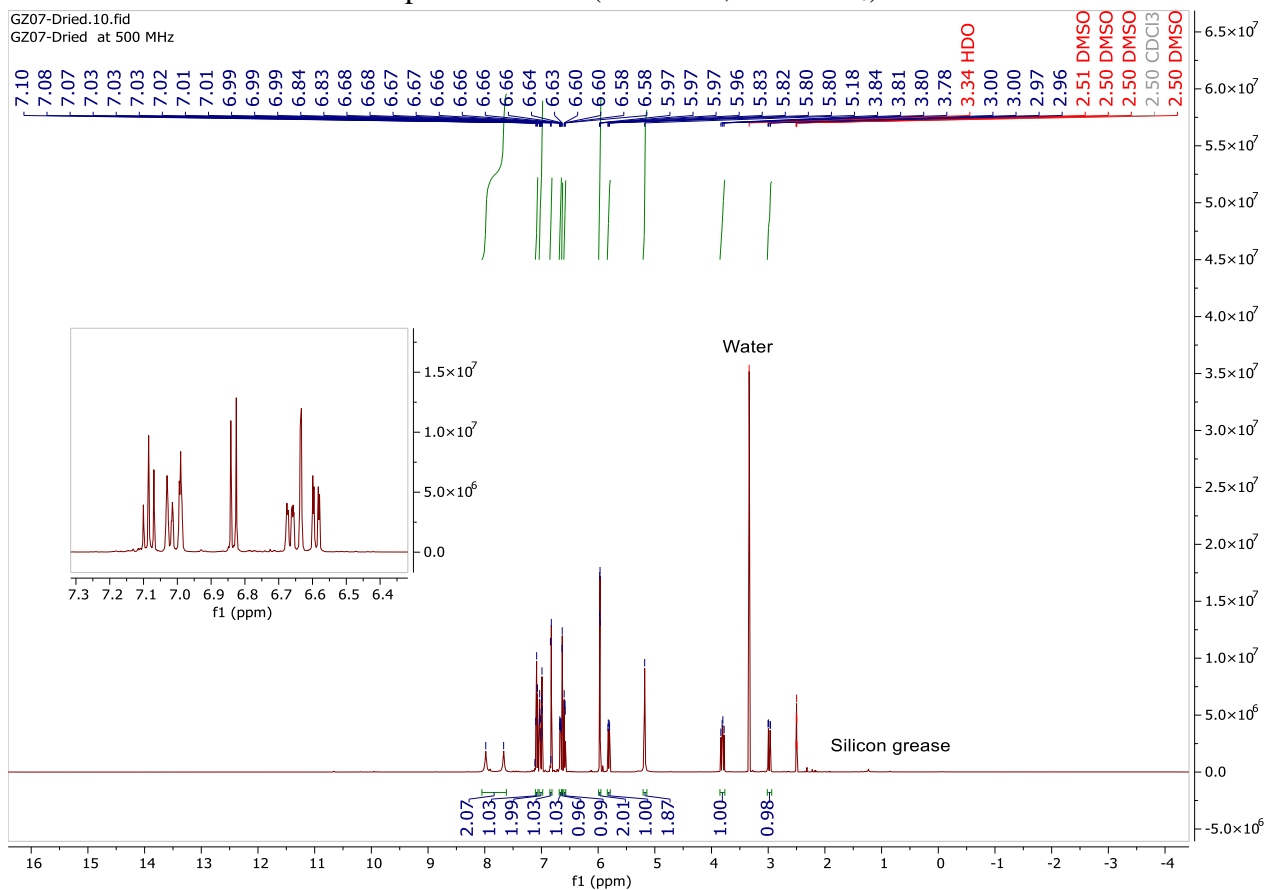

<sup>13</sup>C NMR spectrum of **4c** (126 MHz, DMSO-d<sub>6</sub>)

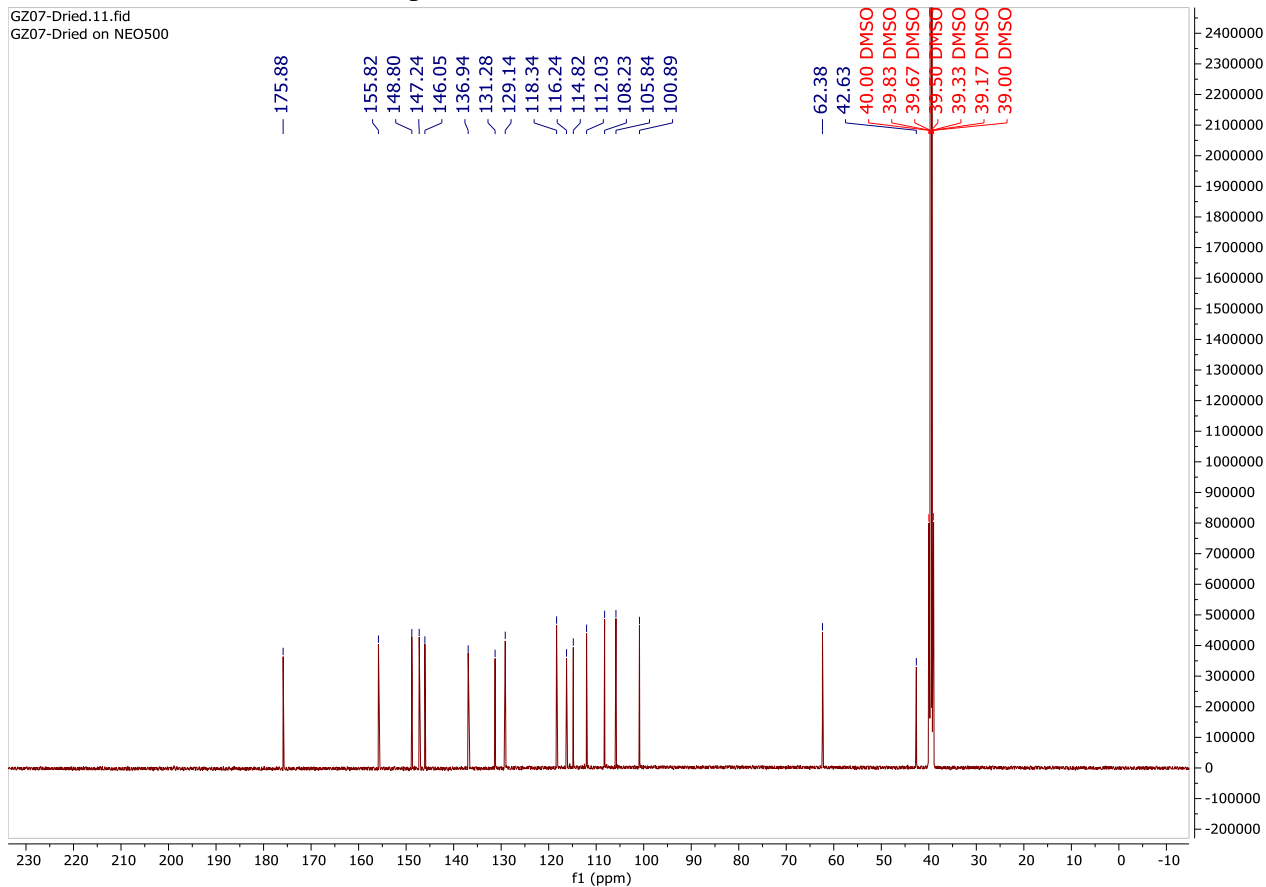

$^1\text{H}$ - $^1\text{H}$  COSY NMR spectrum of **4c**

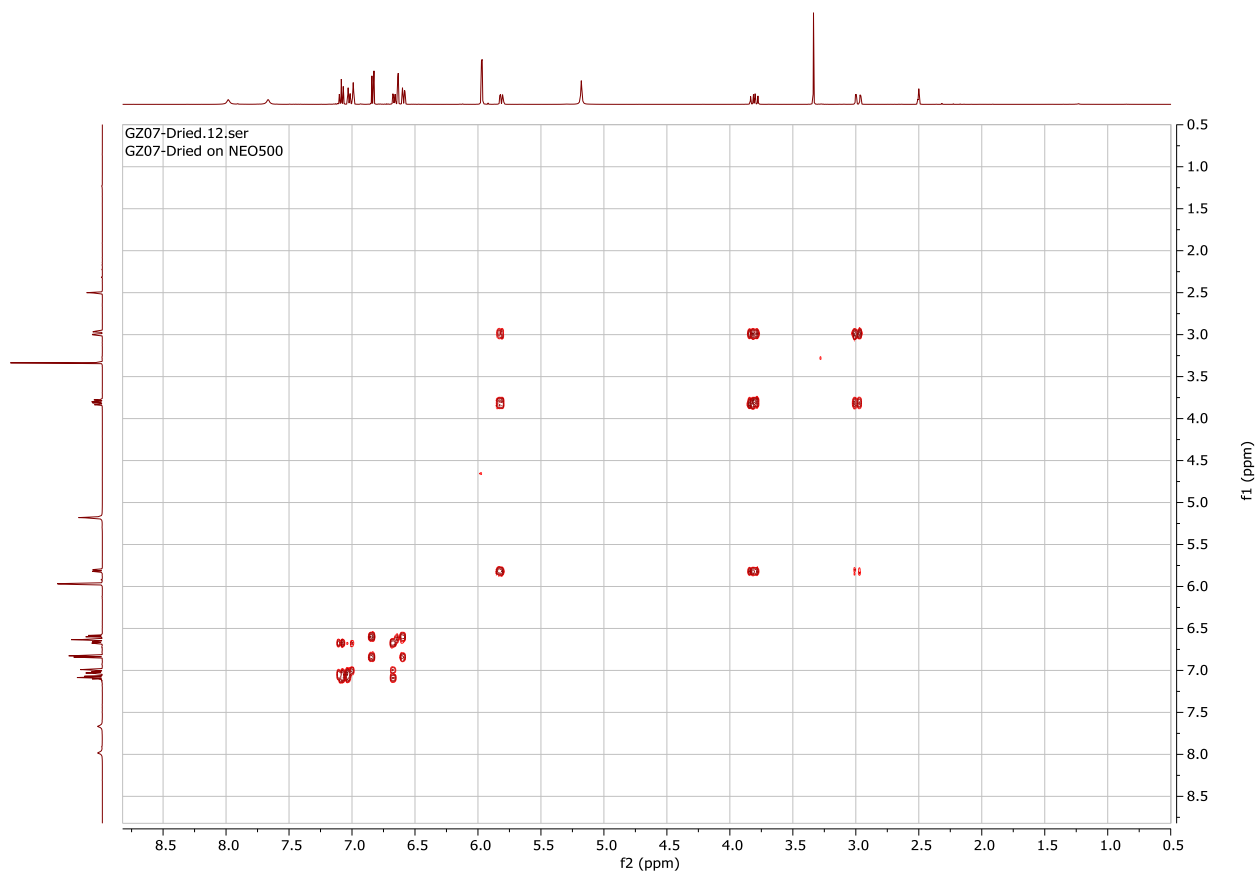



$^1\text{H}$ - $^{13}\text{C}$  HSQC NMR spectrum of **4c**

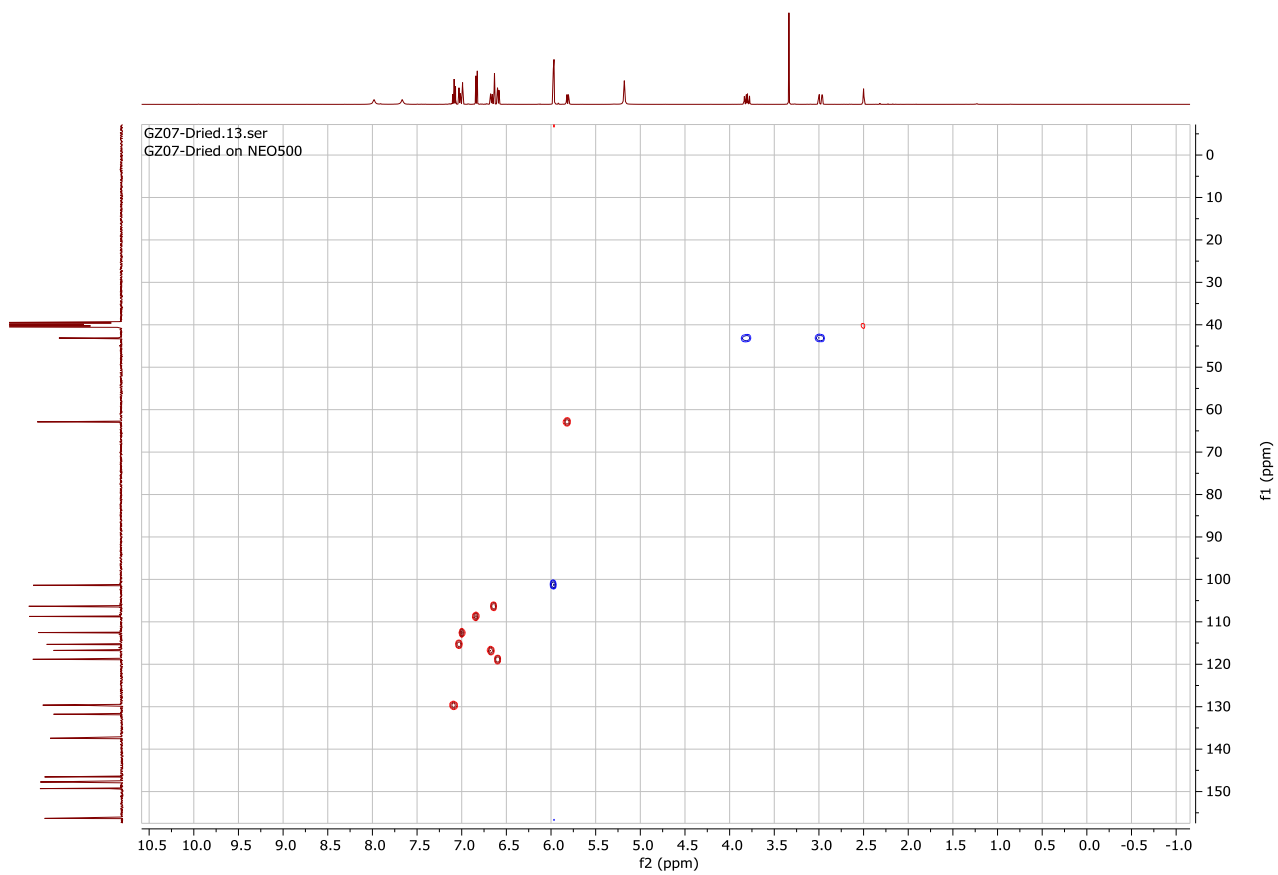

$^1\text{H}$ - $^{13}\text{C}$  HMBC NMR spectrum of **4c**

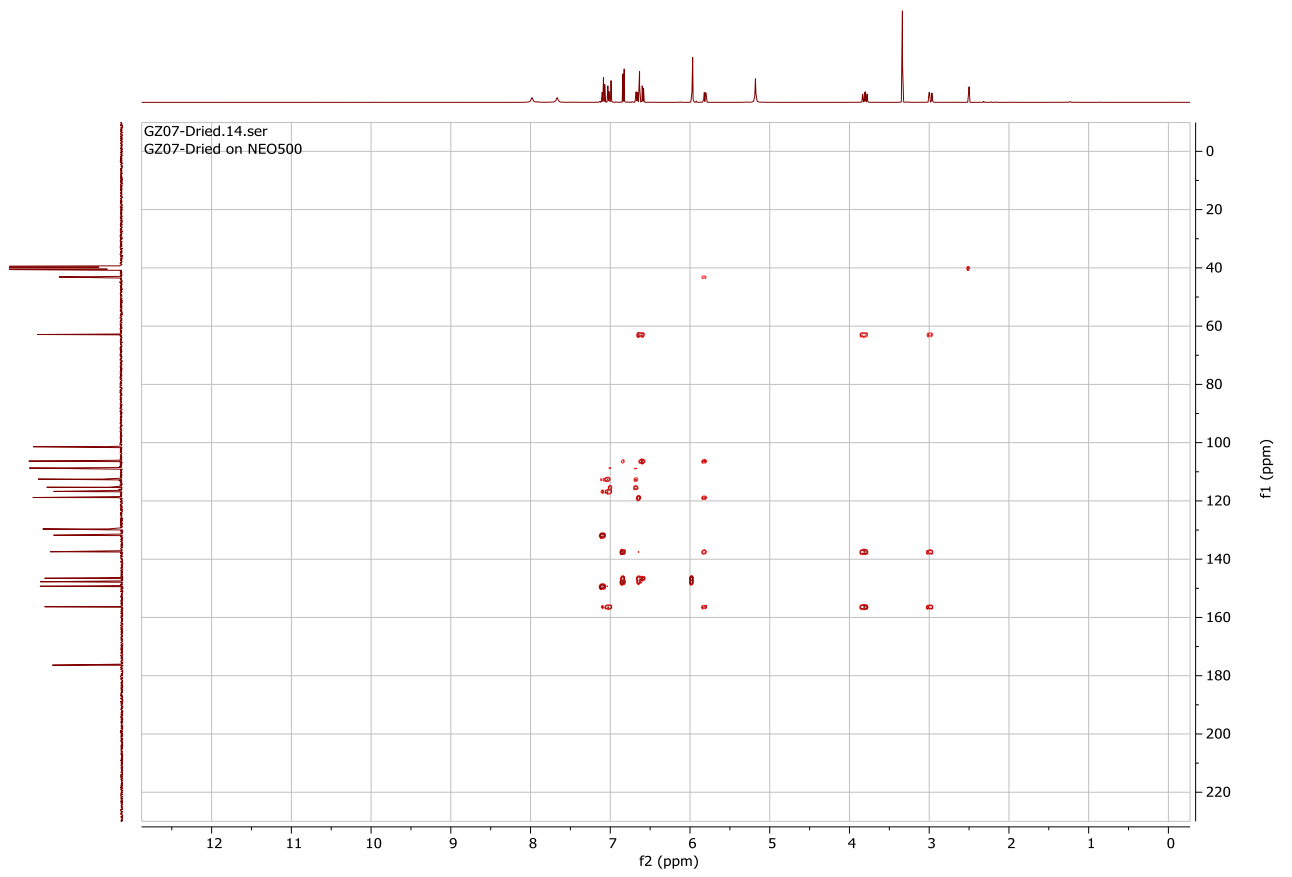

$^1\text{H}$ - $^{15}\text{N}$  HSQC NMR spectrum of **4c**

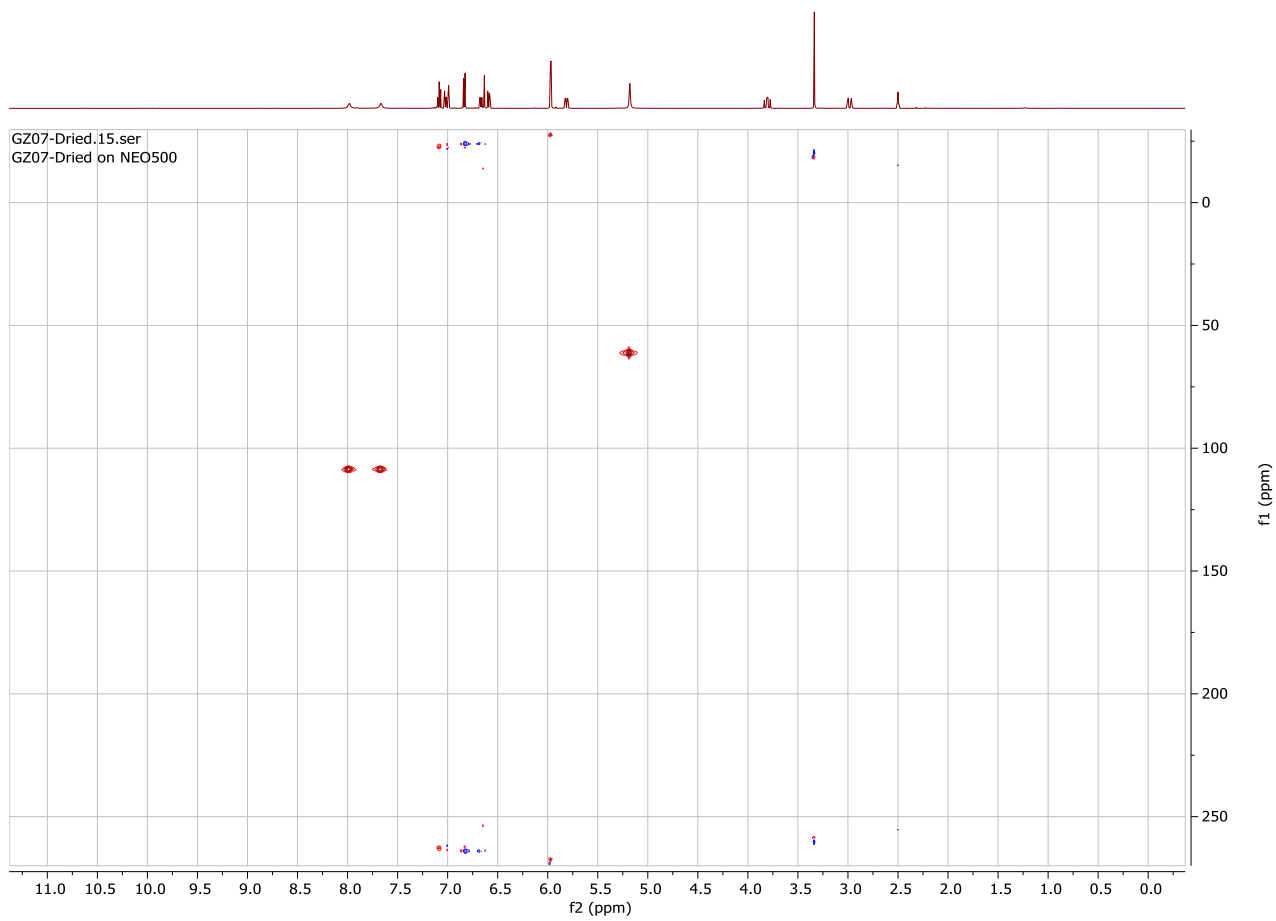

$^1\text{H}$ - $^{15}\text{N}$  HMBC NMR spectrum of **4c**

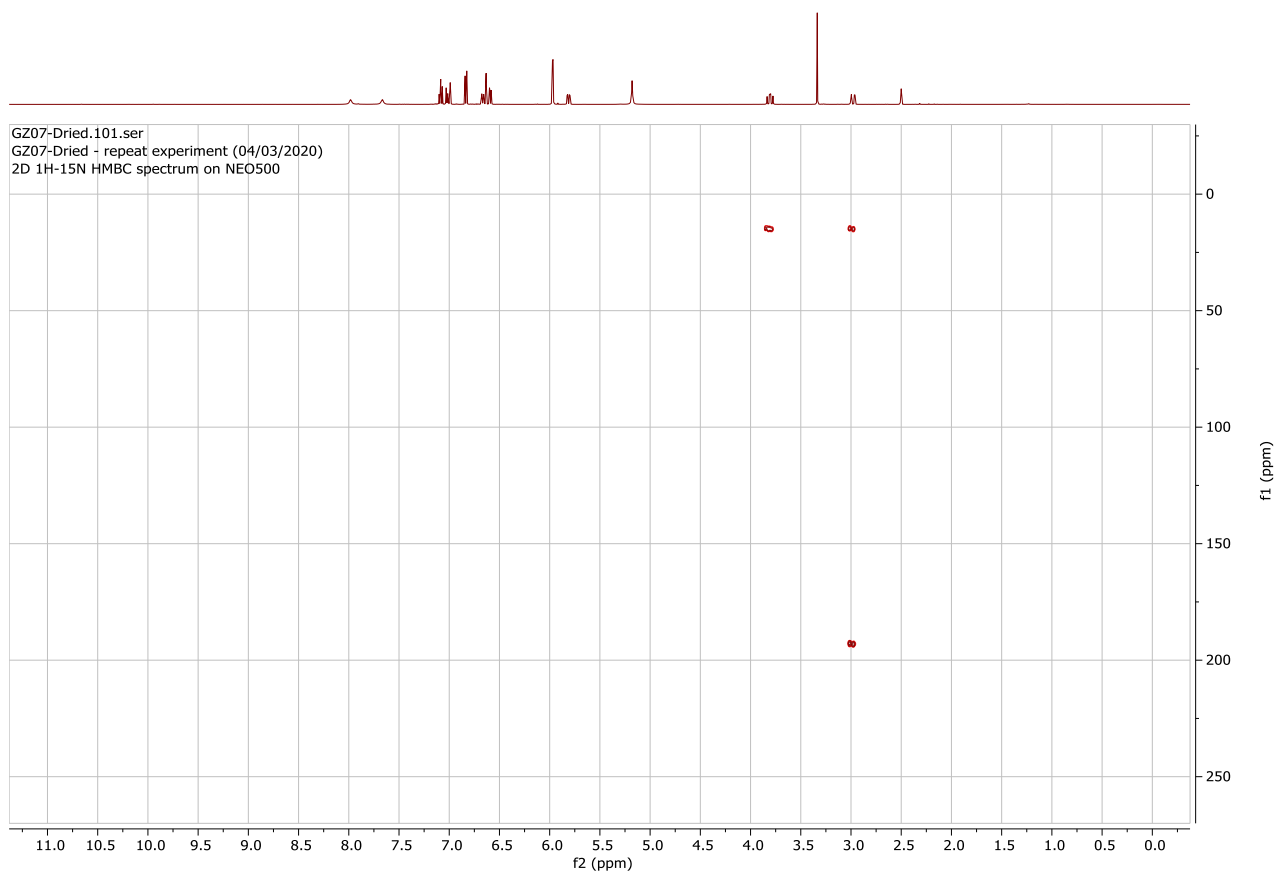

# Mass Spectrometry of 4c

GZ07 C17H16N4O2S MW=340  
(DCM)/CH3OH:H2O:0.1% Formic Acid  
AMJ-GXZ-3KPLP-ESI-1 (0.070) Is (1.00,3.00) C17H16N4O2SH

University of Birmingham, School of Chemistry  
Waters Xevo G2-XS

Gabriel Zazeri  
13-Mar-2020  
1: TOF MS ES+  
7.74e12

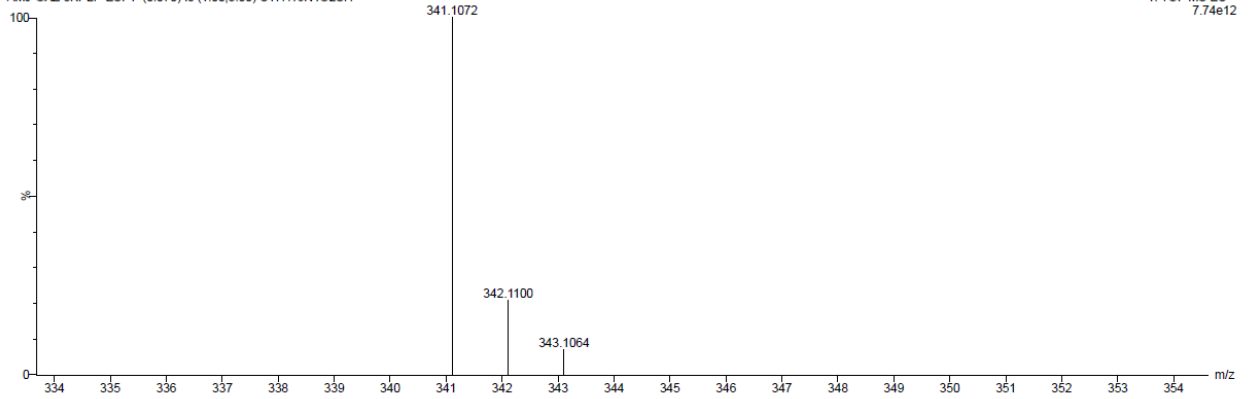

AMJ-GXZ-3KPLP-ESI-1 24 (1.030) AM (Cen,3, 50.00, Ar,10000.0,0.00,0.00); Sm (SG, 10x2.00); Cm (24:25)

1: TOF MS ES+  
8.95e5

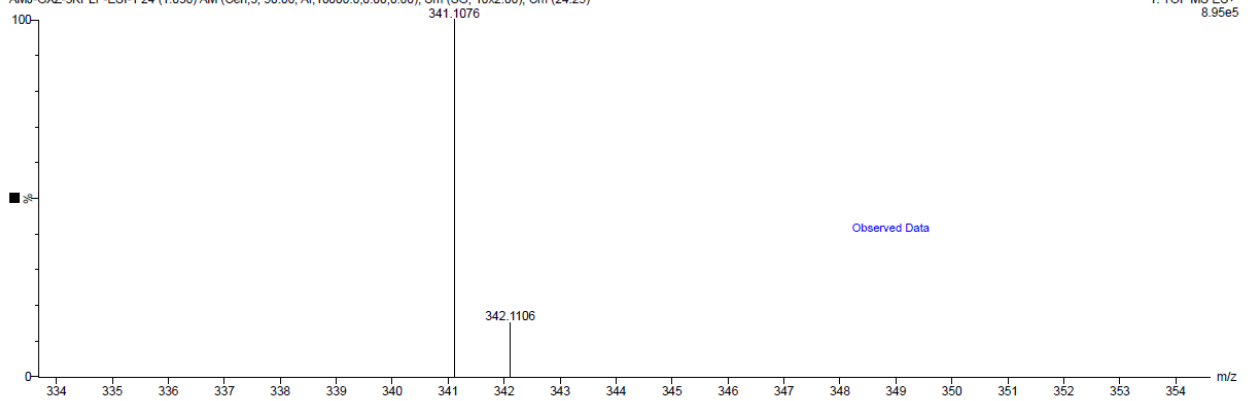

$^1\text{H}$  NMR spectrum of **7a** (300 MHz,  $\text{CDCl}_3$ )

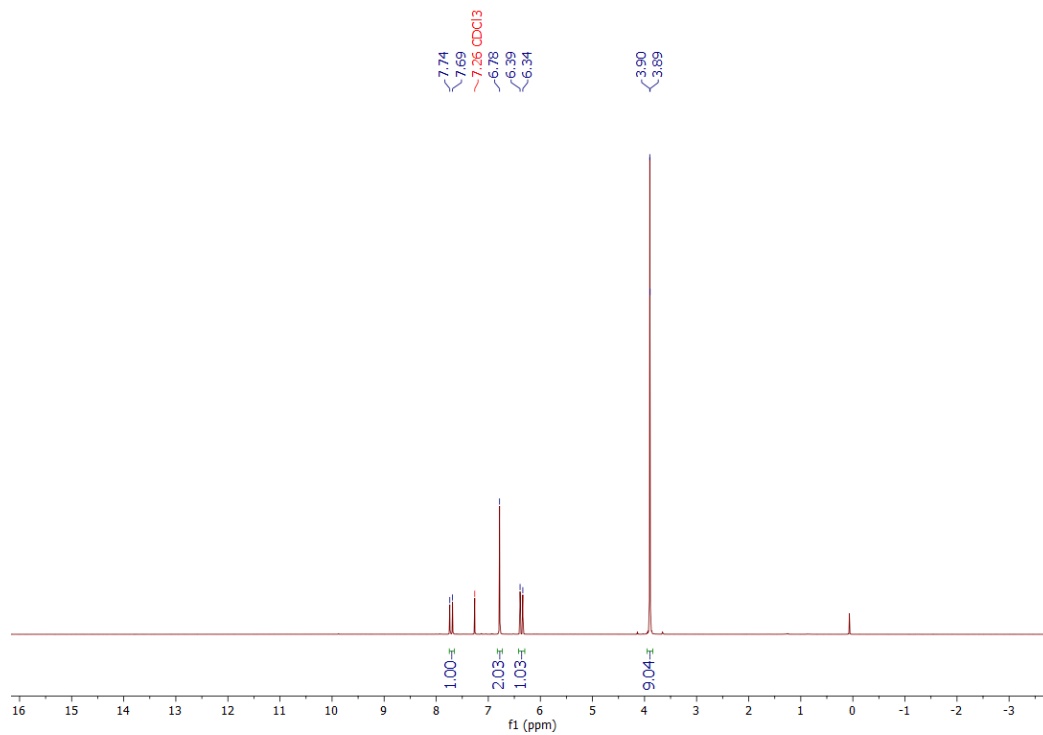

$^{13}\text{C}$  NMR spectrum of **7a** (101 MHz,  $\text{CDCl}_3$ )

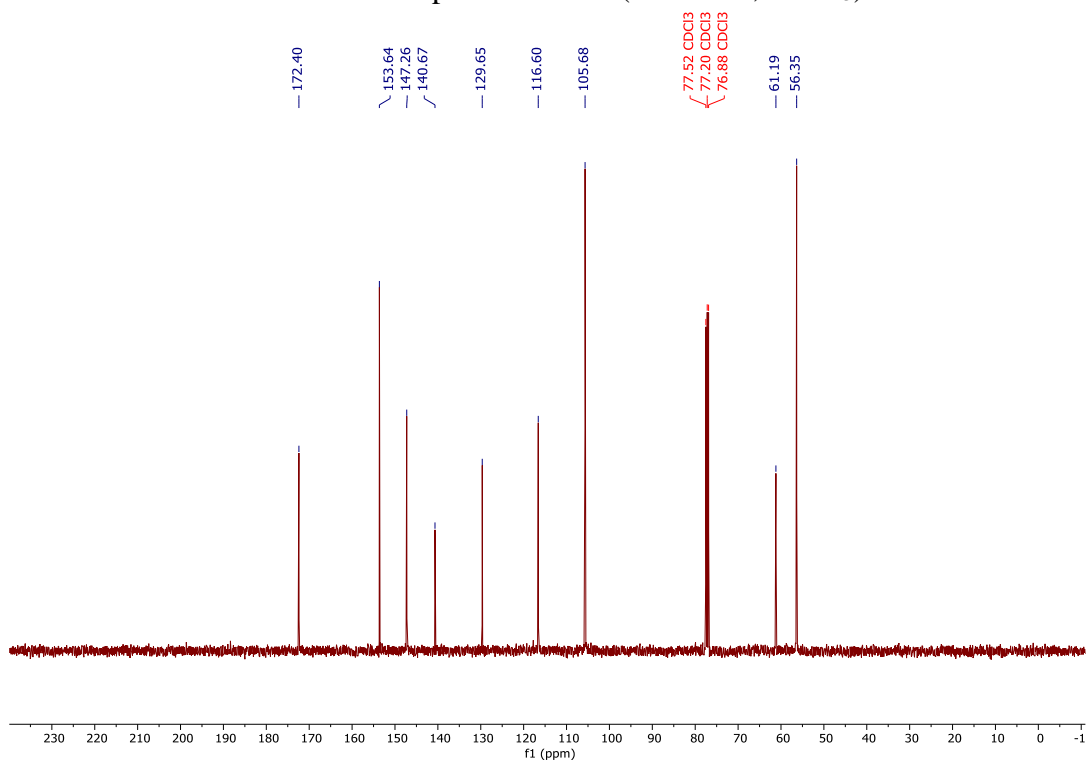

# Mass Spectrometry of 7a

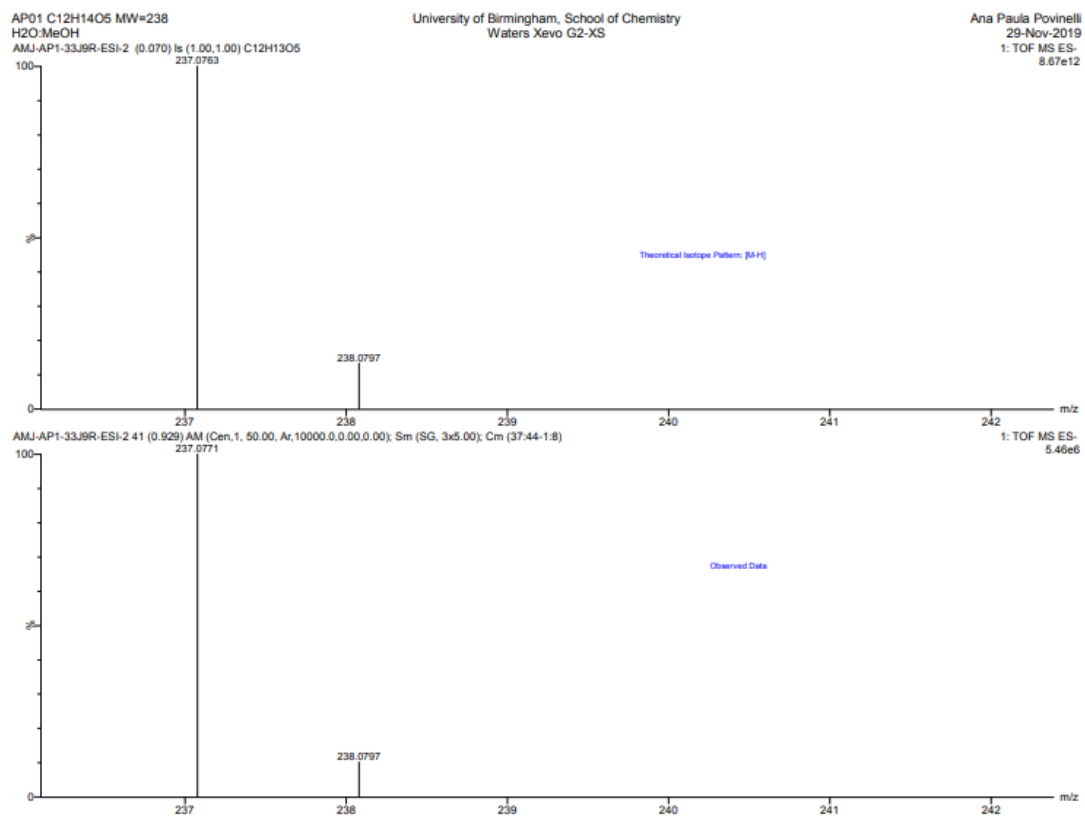



<sup>1</sup>H NMR spectrum of **7b** (300 MHz, CD<sub>3</sub>OD)

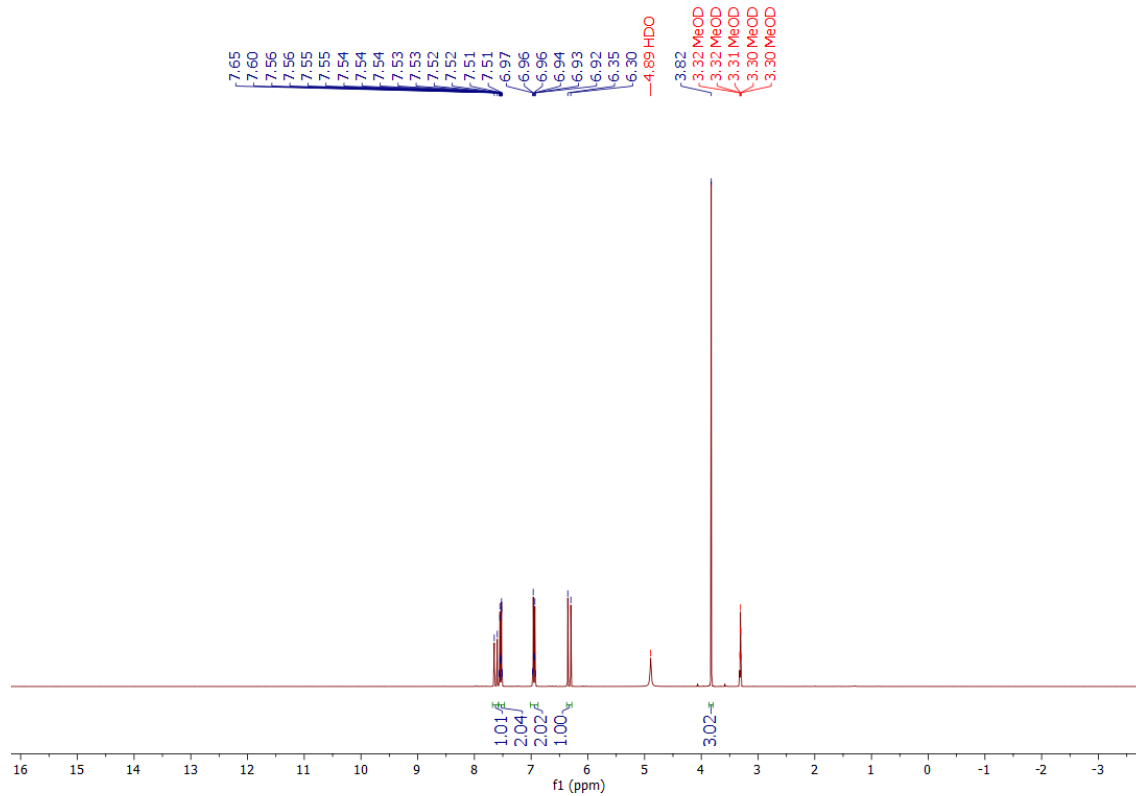

$^1\text{H}$  NMR spectrum of **8a** (300 MHz,  $\text{CDCl}_3$ )

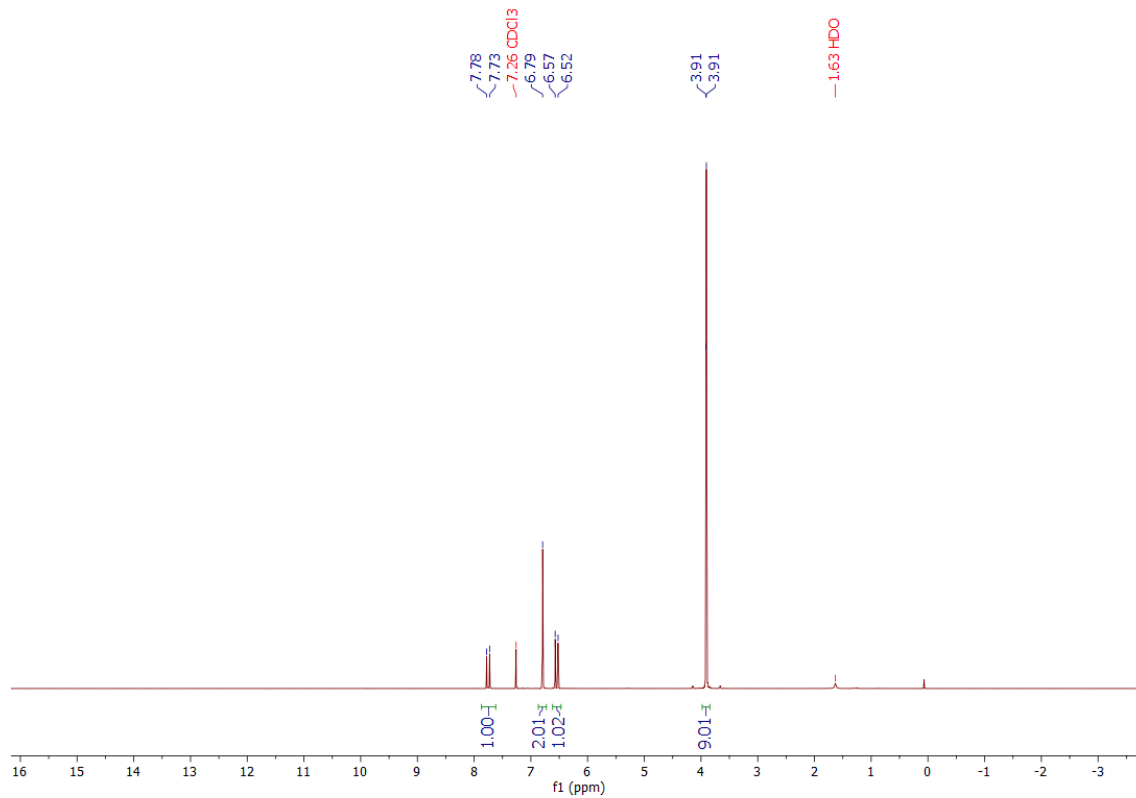

<sup>1</sup>H NMR spectrum of **8b** (300 MHz, CD<sub>3</sub>OD)

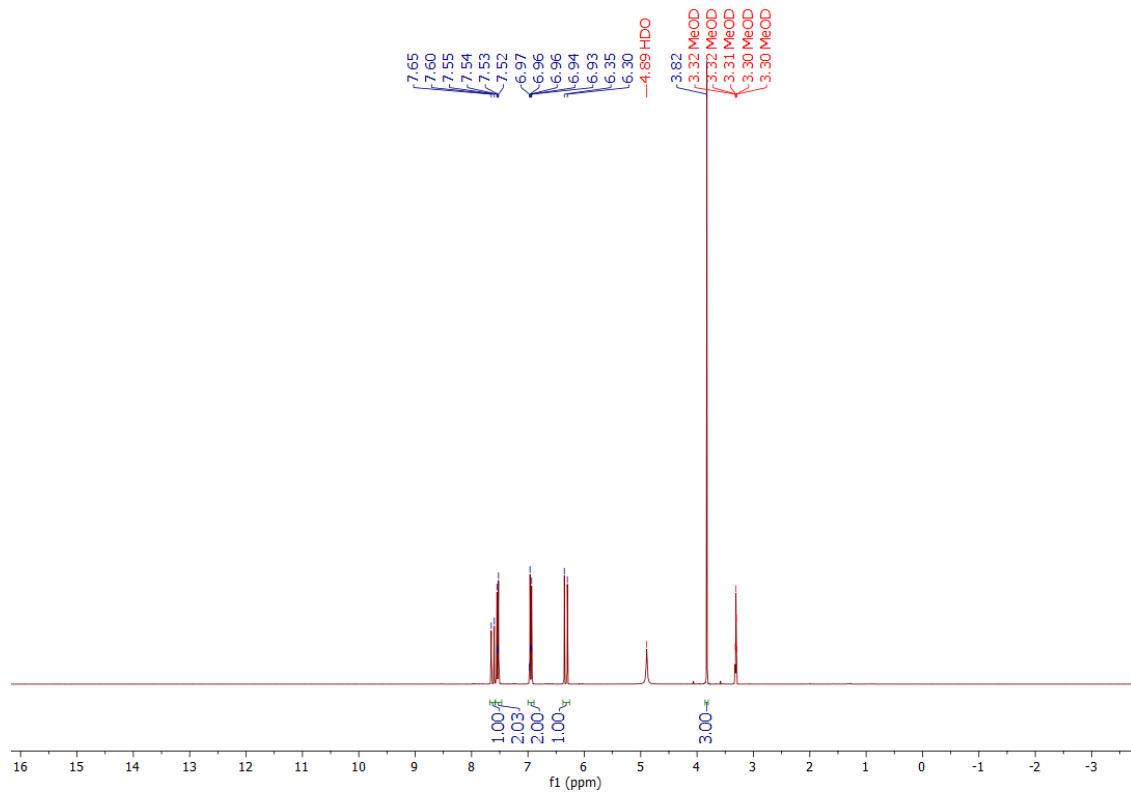

$^1\text{H}$  NMR spectrum of **9a** (300 MHz,  $\text{CDCl}_3$ )

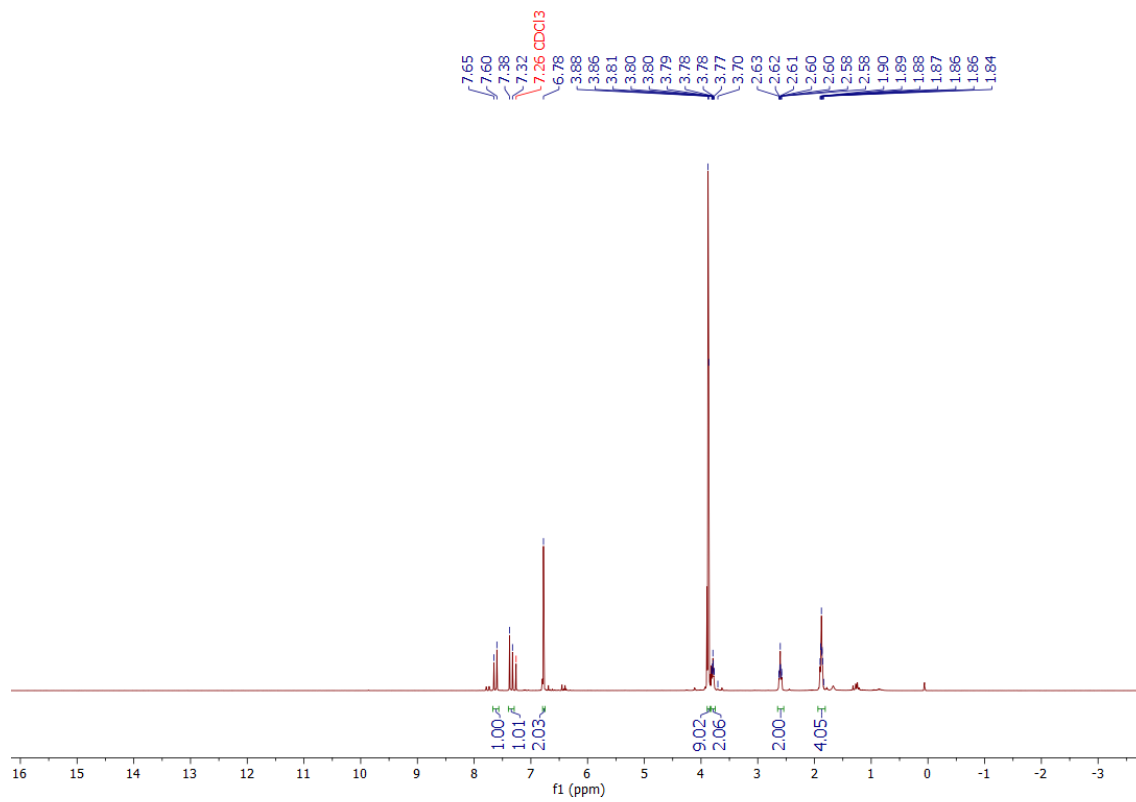

<sup>1</sup>H NMR spectrum of **9b** (300 MHz, CDCl<sub>3</sub>)

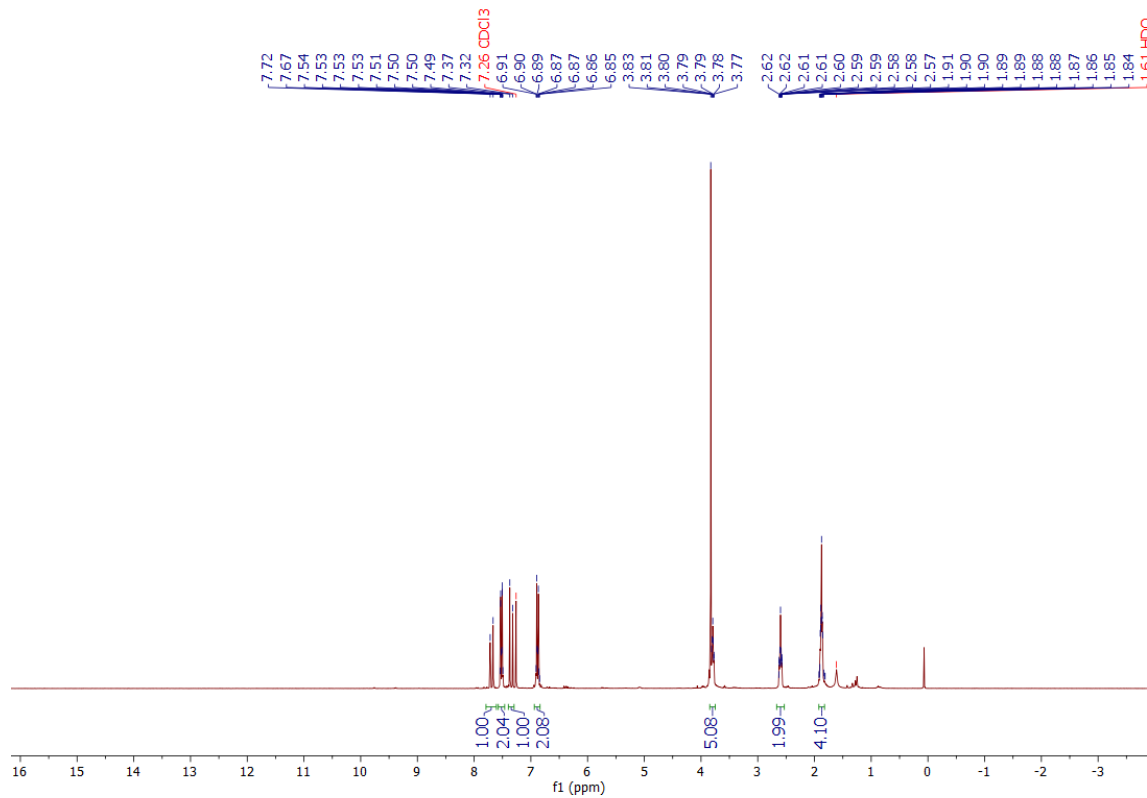

<sup>1</sup>H NMR spectrum of **10** (300 MHz, CDCl<sub>3</sub>)

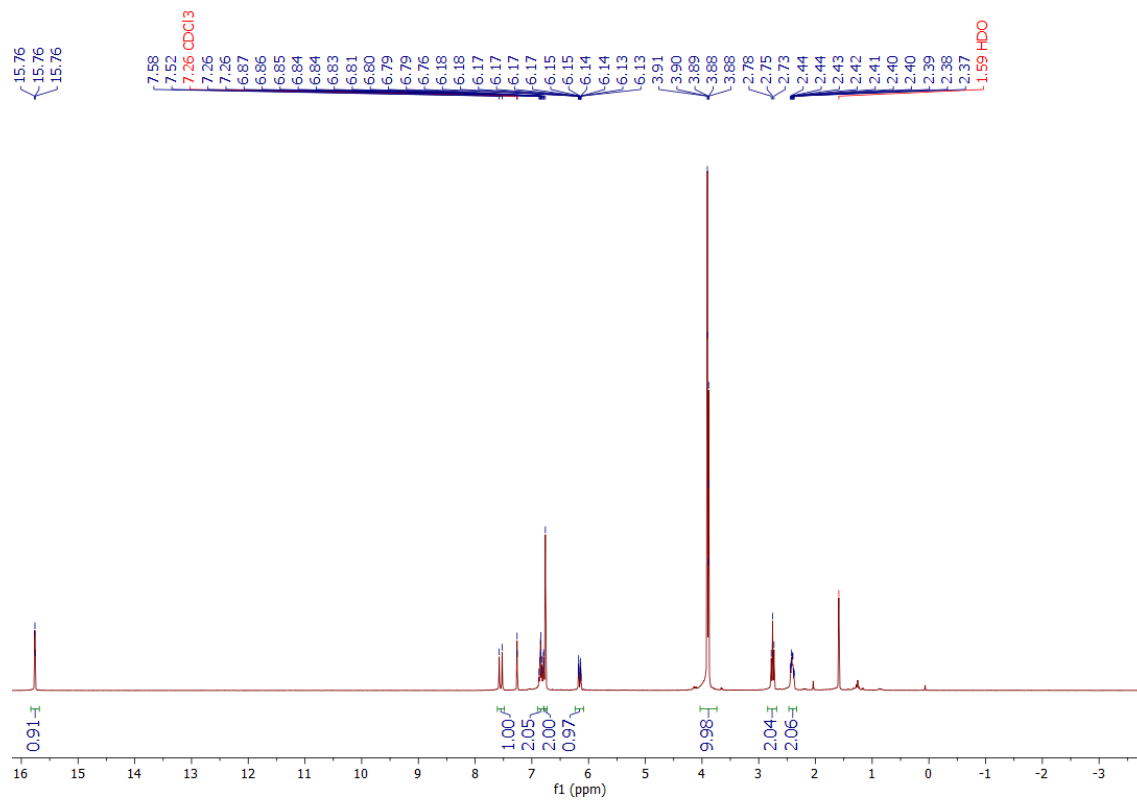

## Computational Models

### Molecular docking

cation- $\pi$  interaction between Lys77 of IL-1B and **3a**, **3c** and **9b**.

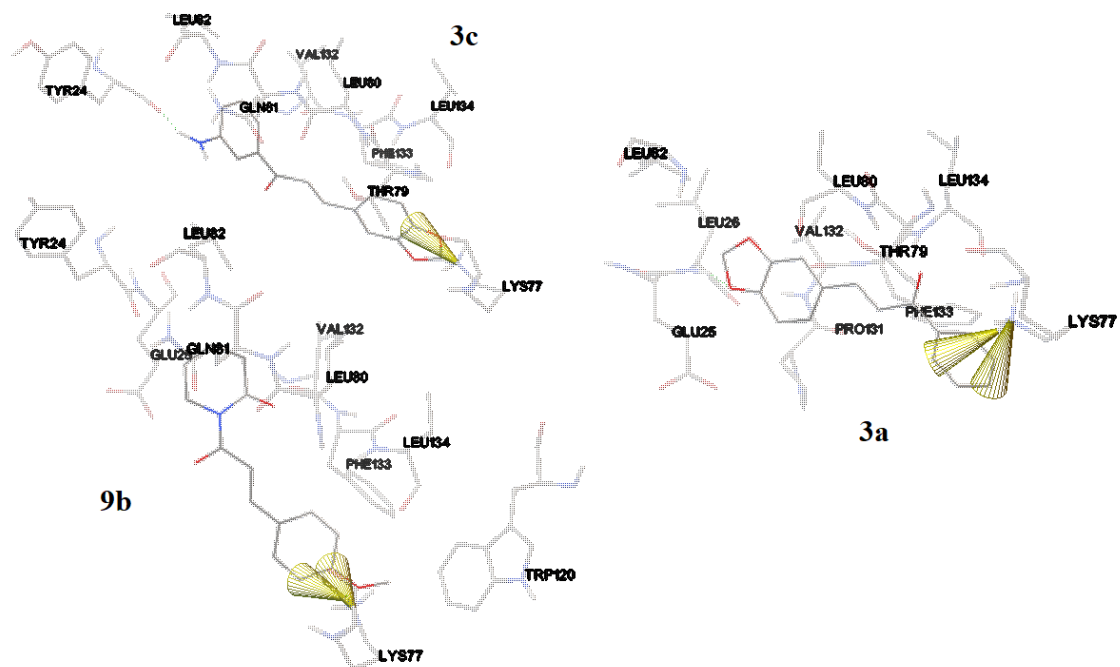

*Ab initio* Calculation of selected dihedral torsional angles

3a

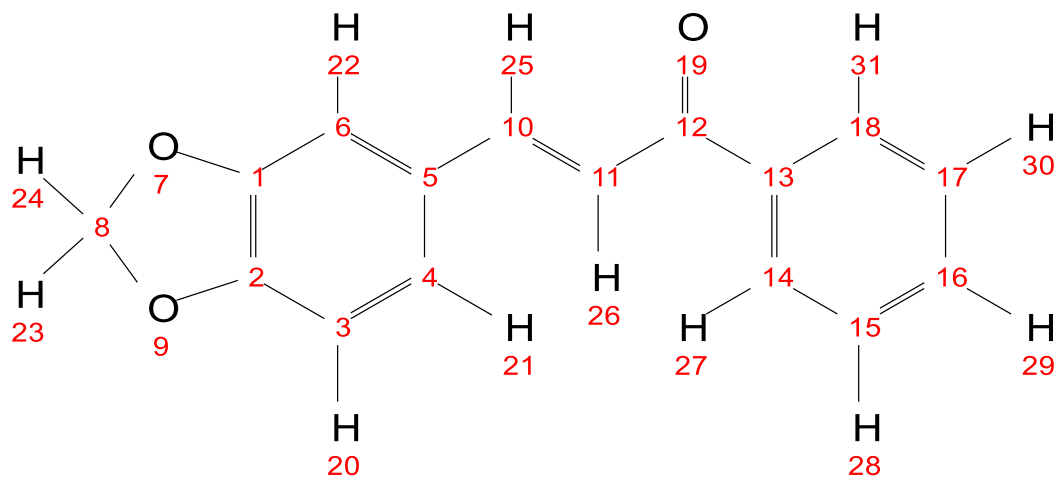

| Dihedral    | Torsional angle |
|-------------|-----------------|
| 14-15-16-17 | 0.228           |
| 18-13-12-11 | 168.513         |
| 19-12-11-10 | -5.721          |
| 10-5-6-1    | 179.978         |
| 7-8-9-2     | -8.186          |
| 2-3-4-5     | 0.087           |



3b

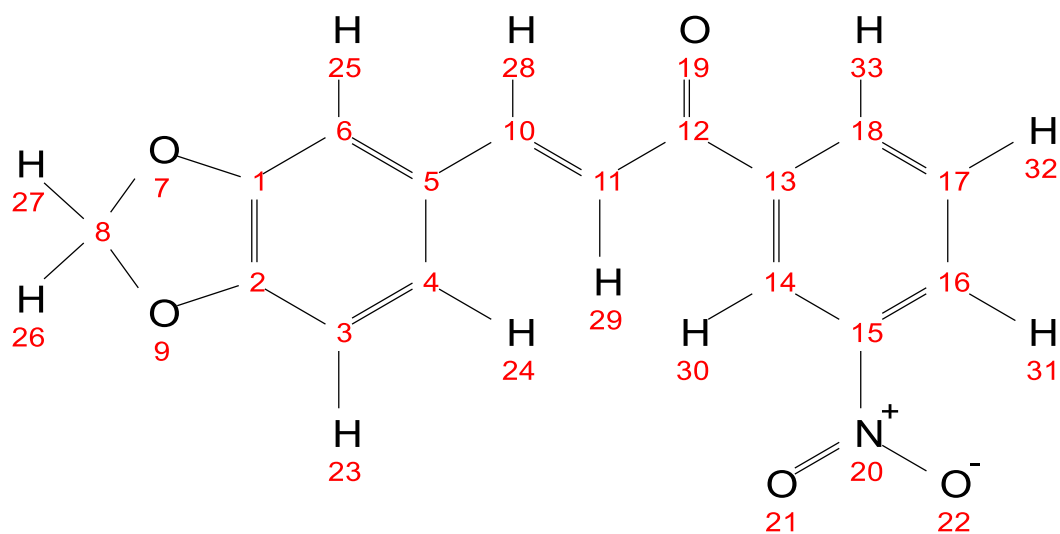

| Dihedral    | Torsional angle |
|-------------|-----------------|
| 21-15-22-20 | -0.036          |
| 22-20-15-16 | -2.658          |
| 16-17-18-13 | 0.112           |
| 18-13-12-19 | -0.218          |
| 18-13-12-11 | 179.987         |
| 11-10-5-6   | 178.969         |
| 6-1-7-8     | 177.766         |
| 8-9-2-3     | -177.792        |

3c

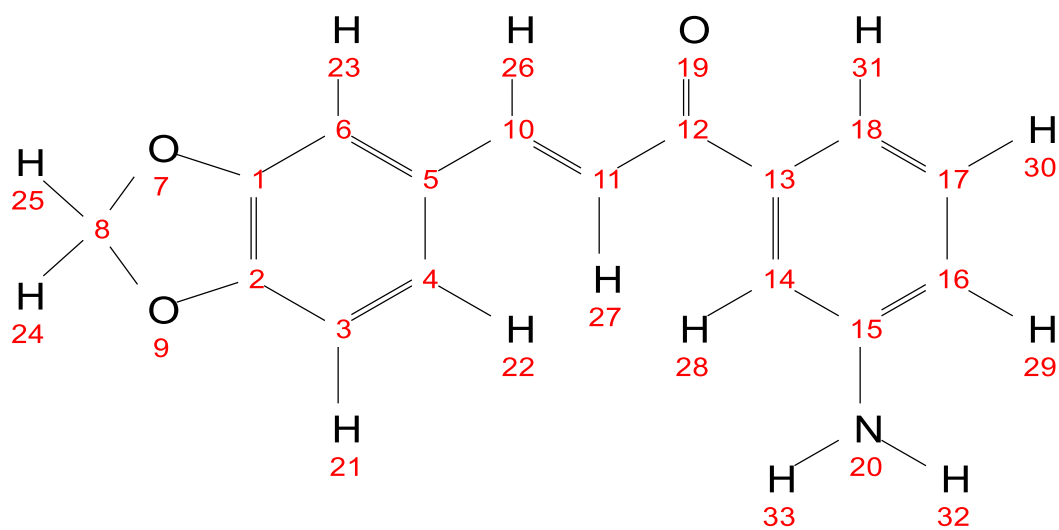

| Dihedral    | Torsional angle |
|-------------|-----------------|
| 20-15-16-17 | -179.849        |
| 16-17-18-13 | 0.012           |
| 18-13-12-19 | -0.793          |
| 18-13-12-11 | 179.225         |
| 11-10-5-6   | 179.596         |
| 5-6-1-7     | -179.991        |
| 8-9-2-3     | -179.961        |

4a

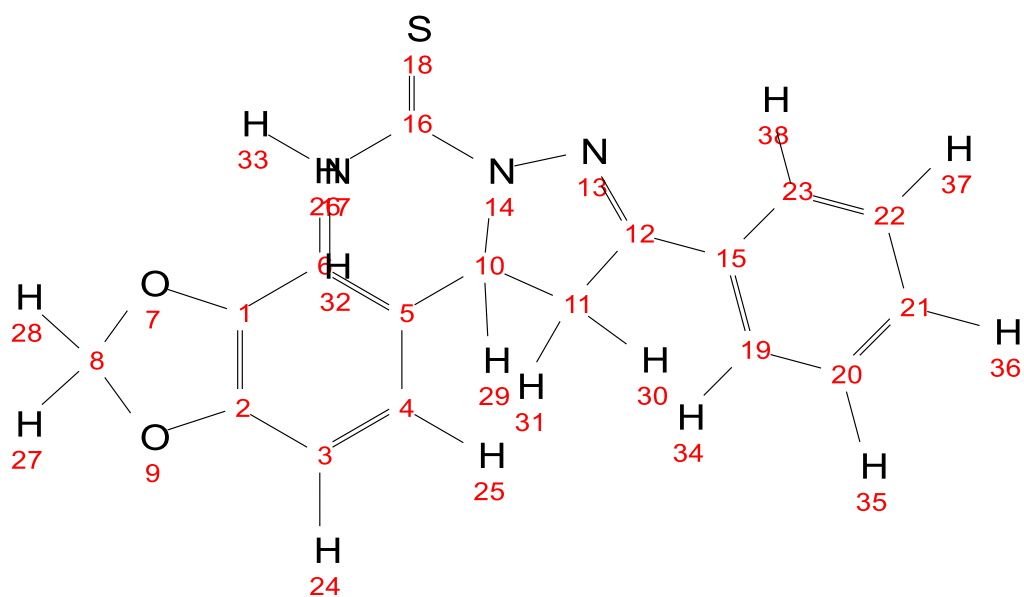

Torsional angle of the dihedral of **4a** simulated in H<sub>2</sub>O

| Dihedral    | Torsional angle |
|-------------|-----------------|
| 19-20-21-22 | -0.067          |
| 23-15-12-11 | 177.810         |
| 12-13-14-10 | 0.626           |
| 13-14-10-11 | -1.407          |
| 14-11-13-10 | -0.950          |
| 14-17-16-18 | -178.286        |
| 11-10-5-4   | -74.257         |
| 11-12-15-19 | -2.859          |
| 4-3-2-9     | 176.492         |
| 8-7-1-32    | -176.820        |

Torsional angle of the dihedral of 5-membered ring of **4a** simulated in CDCl<sub>3</sub>

| Dihedral    | Torsional angle |
|-------------|-----------------|
| 13-14-10-11 | 4.838           |
| 14-11-13-10 | -3.046          |
| 12-13-14-10 | -2.841          |

4c

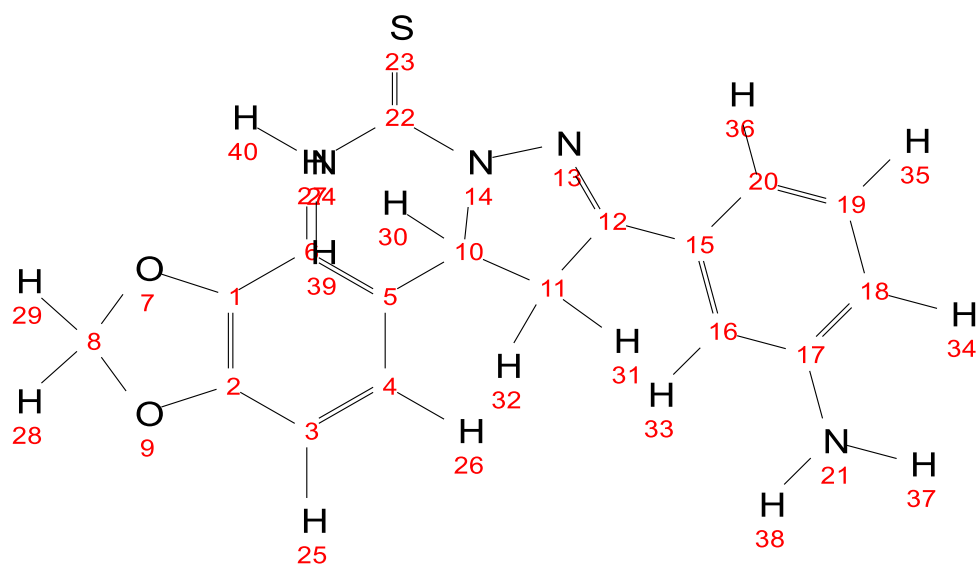

| Dihedral    | Torsional angle |
|-------------|-----------------|
| 21-17-18-19 | 176.732         |
| 20-15-12-11 | -172.194        |
| 12-13-14-10 | 0.626           |
| 13-10-14-11 | -1.407          |
| 13-14-10-11 | 102.997         |
| 6-1-7-8     | 173.361         |
| 8-9-2-3     | -178.833        |
| 6-5-4-3     | 0.268           |

9a

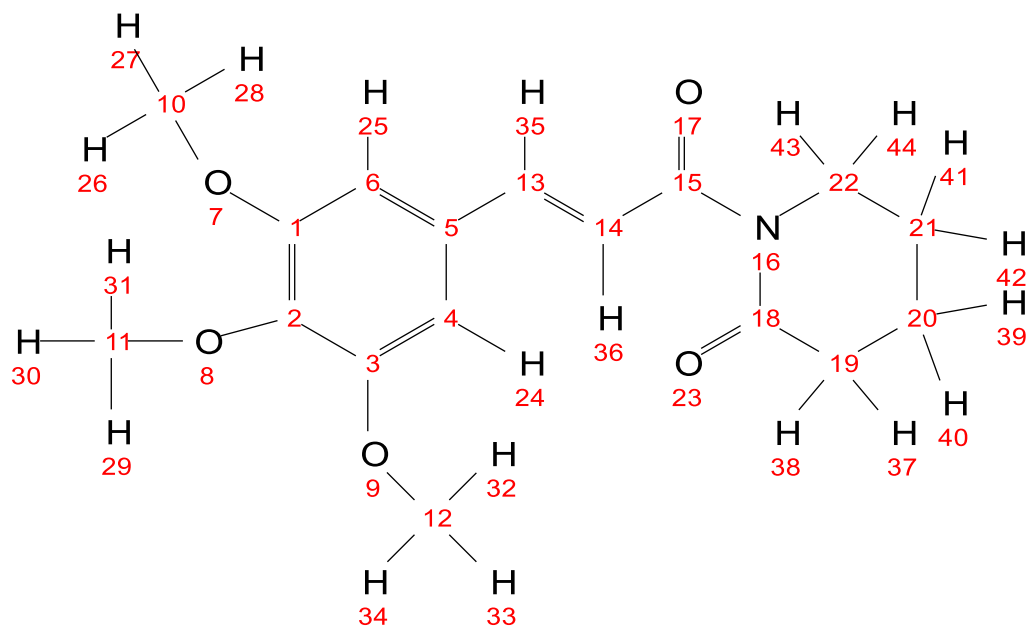

| Dihedral     | Torsional angle |
|--------------|-----------------|
| 20-21-22-16  | -48.558         |
| 22- 16-15-17 | 9.655           |
| 16-15-14-13  | -173.008        |
| 13-5-6-1     | 179.762         |
| 10-7-1-2     | 73.431          |
| 11-8-2-3     | -119.435        |
| 9- 12-3-4    | -134.562        |
| 15-16-22-21  | -167.467        |

9b

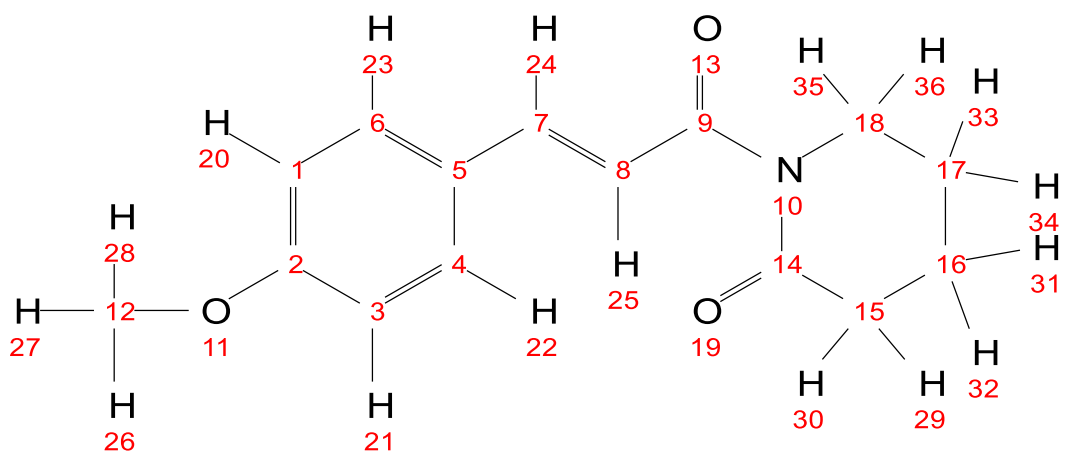

| Dihedral    | Torsional angle |
|-------------|-----------------|
| 19-14-15-16 | -173.441        |
| 17-18-10-9  | -168.002        |
| 13-9-8-7    | 12.815          |
| 5-5-1-2     | 0.191           |
| 12-11-2-3   | -179.427        |
| 8-7-5-6     | 179.783         |
| 19-14-15-16 | -173.441        |
| 17-18-10-9  | -168.002        |

10

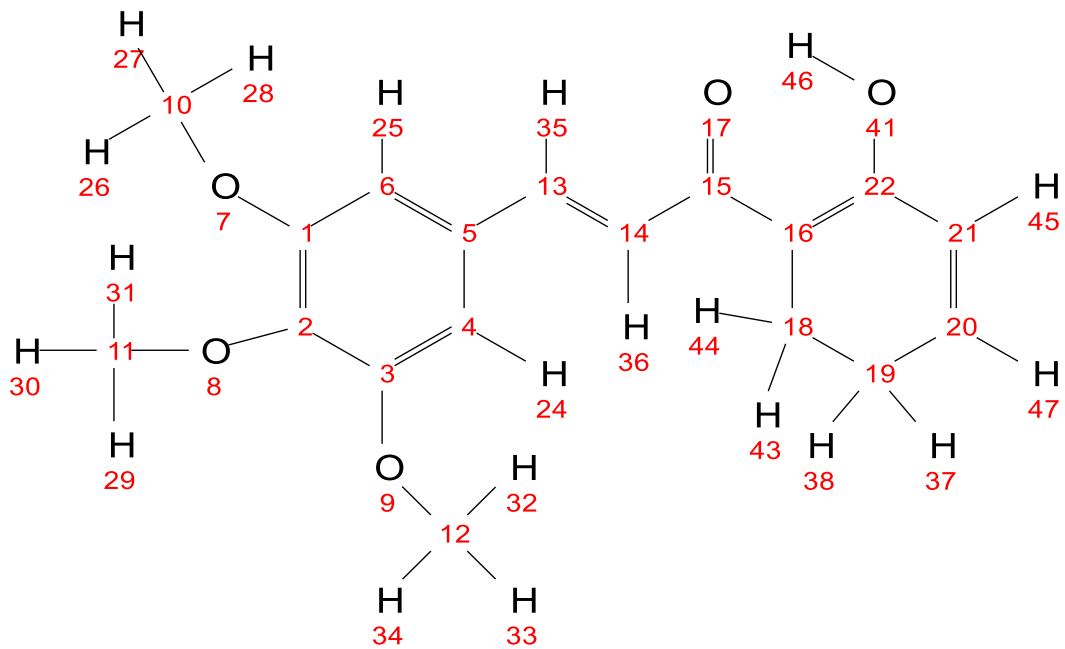

| Dihedral    | Torsional angle |
|-------------|-----------------|
| 18-19-20-21 | 28.591          |
| 41-22-16-15 | 1.471           |
| 17-15-14-13 | -5.019          |
| 15-14-13-5  | 179.702         |
| 10-7-1-2    | 72.840          |
| 11-8-2-3    | -106.728        |
| 12-9-3-4    | 112.209         |
| 14-15-16-22 | 176.508         |

## References

1. Williams, D.B.G.; Lawton, M. Drying of Organic Solvents: Quantitative Evaluation of the Efficiency of Several Desiccants. *J. Org. Chem.* **2010**, *75*, 8351-8354.
2. Sun, L.-D.; Wang, F.; Dai, F.; Wang, Y.-H.; Lin, D.; Zhou, B. Development and mechanism investigation of new piperlongumine derivative as a potent anti-inflammatory agent. *Biochem. Pharmacol.* **2015**, *95*, 156-169.
3. Mathew, A.; Sheeja T. L., M.; Kumar T., A.; Radha, K. Design, Synthesis and Biological Evaluation of Pyrazole analogues of Natural Piperine. *Hygeia J. D. Med.* **2011**, *3*, 48-56.
